# Supplementary material for: Unveiling the spatial link between geodiversity and biodiversity: a multi-taxon study in the South of France
Source: Research Square preprint supplement (doi:10.21203/rs.3.rs-6975829/v1), 2025-07-16
Supplement: Supplementary file 1 [file 72932fa060c76b5fa9000e6e.docx]

# **Supplemental Information**

| **Table S1:** Databases used for modeling the diversity of vascular plants (Tracheophyta) (n = 4,279,291). | |
| --- | --- |
| **Database name** | **Number of observations** |
| PlantNet automatically identified occurrences | 477,497 |
| Divers jeux de données floristiques produits par le réseau des botanistes amateurs dans les départements du 06, 11, 13, 30, 34, 48, 66, 83, 84 | 434,947 |
| Données flores issues de la base de données de Jean-Marc Lewin | 419,632 |
| Divers jeux de données floristiques produits par le CBNMED sur son territoire d'agrément | 364,440 |
| Relevés floristiques du protocole de l'Inventaire National Forestier de l'IGN | 355,155 |
| Divers jeux de données floristiques produits par le CEN du Languedoc-Roussillon dans les départements du 06, 11, 13, 30, 34, 48, 66, 83, 84 | 158,601 |
| Observations opportunistes Flore, Fonge et Bryophytes des salariés et bénévoles de l'association Nature en Occitanie (ex-Nature en Midi-Pyrénées) en Midi-Pyrénées | 130,001 |
| Données d'observations flore du réseau Tela Botanica (hors programmes spécifiques) | 129,947 |
| Observations opportunistes Flore, Fonge et Bryophytes du CRPF en Midi-Pyrénées | 110,756 |
| Divers jeux de données floristiques produits par la Fédération France Orchidées (FFO) | 107,440 |
| Pl@ntNet observations | 97,433 |
| Jeux de données floristiques produits par les Réserves Naturelles Catalanes | 89,977 |
| Observations opportunistes Flore, Fonge et Bryophytes des salariés et bénévoles du CBNPMP | 82,179 |
| Carnet en Ligne | 76,200 |
| Divers jeux de données flore en provenance du bureau d'études BIOTOPE dans les départements du 06,11,13,30,34,48,66,83,84 | 58,106 |
| Inventaire floristique vasculaire et lichens | 57,154 |
| Divers jeux de données floristiques produits par la Fédération Aude Claire | 52,653 |
| Divers jeux de données issues de la bibliographie dépouillées par le CBNMED | 46,915 |
| Inventaire général de la flore vasculaire de Midi-Pyrénées par le CBNPMP | 43,574 |
| Observation.org, Nature data from around the World | 41,719 |
| Divers jeux de données floristiques produits par l'AMBHHC dans les départements du 06,11,13,30,34,48,66,83,84 | 41,471 |
| Application INPN Espèces: Observations naturalistes, participatives et opportunistes, fondées sur des photographies | 37,694 |
| Observations opportunistes Flore, Fonge et Bryophytes des salariés et bénévoles de l'ANA | 37,135 |
| Divers jeux de données floristiques produits par les Ecologistes de l'Euzière dans les départements du 06,11,13,30,34,48,66,83,84 | 35,863 |
| iNaturalist Research-grade Observations | 35,075 |
| Divers jeux de données floristiques produits par la Société d'Horticulture et d'Histoire Naturelle du 34 dans les dép. du 06,11,13,30,34,48,66,83,84 | 34,031 |
| Observations Flore, Fonge et Bryophytes du CEN Midi-Pyrénées | 26,217 |
| Données acquises dans le cadre de l'activité du bureau d'étude BIOTOPE (1994 - 2013) | 24,863 |
| Observations Flore, Fonge et Bryophytes de l'ONF en Midi-Pyrénées | 24,630 |
| Appel à Projet Connaissances en Occitanie sur les départements 11,30,34,48 et 66 | 23,824 |
| Observations occasionnelles Parc national des Pyrénées | 23,461 |
| Divers jeux de données flore en provenance du bureau d'études ECOMED dans les départements du 06, 11, 13, 30, 34, 48, 66, 83, 84 | 23,285 |
| Divers jeux de données flore en provenance du bureau d'études Cabinet Barbanson Environnement dans les départements du 06,11,13,30,34,48,66,83,84 | 21,461 |
| Inventaires réalisés par le CBNPMP pour sa mission d'appui à Natura 2000 en Midi-Pyrénées | 20,429 |
| Divers jeux de données flore produits par le CBNMed sur l'ex région LR dans le cadre d'inventaires habitats naturels financés par la DREAL Occitanie | 19,119 |
| Contact aléatoire tous règnes confondus _ obs_occ | 18,511 |
| Divers jeux de données du CBNMED produites dans le cadre de programmes scientifiques | 16,867 |
| Relevés phytosociologiques produits par le CBNMed dans le Gard et l'Hérault dans le cadre du programme CarHab | 16,668 |
| Production de données flore dans le cadre de l'animation par le CBNMed du réseau des botanistes amateurs de l'ex région LR | 15,525 |
| Divers jeux de données floristiques produits par le Bureau d'études Nymphalis dans les départements du 06, 11, 13, 30, 34, 48, 66, 83, 84 | 15,006 |
| Divers données flores historiques produites par les anciens CEN LR et Lozères et absentes de la base SICEN Occitanie. | 14,650 |
| Relevés de végétations produits par le CBNMed dans le cadre du programme Trame Turquoise | 14,039 |
| Contact aléatoire tous règnes confondus | 12,688 |
| Inventaires réalisés pour le projet de PNR d'Ariège | 12,644 |
| Divers jeux de données floristiques produits par le Parc naturel régional de la Narbonnaise | 12,440 |
| Observations Flore, Fonge et Bryophytes du Parc National des Pyrénées | 11,886 |
| ONF - Observations opportunistes et inventaires | 11,236 |
| Flore - Inventaire non protocolé | 11,177 |
| [ABC] - PNP - Inventaire Faune-Flore-Fonge | 10,925 |
| Données flore produites par le CBNMed dans l'ex région LR dans la cadre l'inventaire en continu des ZNIEFF | 10,051 |
| Données Vigie-Flore | 9,455 |
| Données d'observation flore issues du programme Sauvages de ma rue (MNHN, Tela Botanica) | 9,299 |
| Recherche et suivi de la flore rare et menacée par le CBNPMP en Occitanie | 8,662 |
| Divers jeux de données floristiques produits par le Bureau d'études Naturalia Environnement dans les départements du 06, 11, 13, 30, 34, 48, 66, 83, 84 | 8,290 |
| Données anciennes produites par le Parc national des Cévennes et saisies par le CBNMed | 7,880 |
| Données flores produites par le CBNMed dans cadre du programme Messicoles de Cerdagne | 7,714 |
| [ABC] - Amis du PNP - Inventaire Faune-Flore-Fonge | 7,394 |
| PRA Euphorbia Peplis porté par le CBNMed dans le cadre de 6 projets de mesures compensatoires | 7,049 |
| Données flore produites par le CBNMed dans l'ex région LR dans le cadre de mesure compensatoire | 6,975 |
| Divers jeux de données floristiques produits en ex LR par la Société Mycologique et Botanique de Catalogne Nord | 6,872 |
| Données d'observation saisies via le projet Pl@ntNet (Tela Botanica) | 6,550 |
| Inventaires du CBNPMP dans le cadre de CARHAB | 5,867 |
| Divers jeux de données flore sur l'ex région LR en provenance du bureau d'études CRB Environnement | 5,803 |
| Divers jeux de données floristiques produits par le monde associatif dans l'ex région LR | 5,419 |
| Programmes messicoles dans les départements du 11, 30, 34, 48, 66. | 5,280 |
| naturgucker | 4,850 |
| Divers jeux de données flore sur l'ex région LR en provenance du Bureau d'études Jean Laurent Hentz | 4,786 |
| Inventaires du CBNPMP sur les pelouses sèches en Midi-Pyrénées | 4,655 |
| Données naturalistes de PARADIS Anne-Hélène | 4,614 |
| Relevés phytosociologiques pour la conception de la typologie et de la cartographie du site Natura 2000 'Causses du Larzac | 4,516 |
| Inventaires réalisés par le CBNPMP dans la RNR du Pibeste-Aoulhet | 4,504 |
| Données Prune Pellet | 4,460 |
| Divers jeux de données du CBNMED produites dans le cadre d'expertises | 4,446 |
| Données flore produites par le CBNMed dans l'ex région LR dans le cadre de concours prairies fleuris | 4,370 |
| Divers jeux de données flore en provenance de divers Bureaux d'études dans les départements du 06, 11, 13, 30, 34, 48, 66, 83, 84 | 3,986 |
| Cartographie des Leguminosae (Fabaceae) en France | 3,787 |
| Atlas de la Biodiversité Communale sur le territoire du Parc National des Pyrénées - Données du CEN MP | 3,715 |
| ENS du Gard - plans de gestion et inventaires (bureaux d'étude) | 3,713 |
| Divers jeux de données floristiques produits en ex LR par l'association Barmy Botanists | 3,651 |
| Production de données flore dans le cadre du programme européen FLORAPYR EFA 100-15 dans l'Aude et les PO | 3,635 |
| Divers jeux de données flore en provenance du Bureau d'études Nicolas Borel Consultant dans les départements du 06,11,13,30,34,48,66,83,84 | 3,621 |
| Divers jeux de données floristiques produits en ex LR par l'association Lozérienne pour l'Etude et la Protection de l'Environnement | 3,613 |
| Inventaires du CBNPMP dans le cadre du Concours Prairies fleuries en Midi-Pyrénées | 3,607 |
| Divers jeux de données floristiques produits par l'association Gard Nature dans les départements du 06,11,13,30,34,48,66,83,84 | 3,590 |
| Inventaire et suivis d'espèces dans le Parc national des Cévennes | 3,579 |
| Divers jeux de données floristiques produits par la Tour du Valat dans les départements du 06,11,13,30,34,48,66,83,84 | 3,489 |
| [HORS_PROTOCOLE] - Contributions à la connaissance sur la biodiversité du Parc National des Pyrénées | 3,427 |
| Divers jeux de données sur les EVEE du CPIE Haut Languedoc | 3,364 |
| fundiv france database | 3,257 |
| Jeux de données produits par le CBNMed lors de programmes sur les habitats naturels dans l'ex région LR | 3,256 |
| Données naturalistes de D'ONOFRIO Patrice | 3,244 |
| Jeu de données flores produit dans le cadre du PRA Lagunes temporaires | 3,167 |
| Spatially explicit database of tree related microhabitats (TreMs). Version 1.2. Integrate+ project | 3,147 |
| Jeu de données personnel de Bruncvik Roman | 3,054 |
| Divers jeux de données flore sur l'ex région LR en provenance du bureau d'études CERA Environnement | 3,044 |
| Divers jeux de données floristiques produits en ex LR par le Syndicat mixte du bassin de l'Or | 3,034 |
| Observations opportunistes Flore, Fonge et Bryophytes des salariés et bénévoles de l'association Nature Comminges en Midi-Pyrénées | 2,857 |
| Inventaires réalisées par le CBNPMP dans le cadre de l'appui à la MAET HERB07 en Midi-Pyrénées | 2,769 |
| Divers jeux de données floristiques produits par le Bureau d'études ECOSPHERE dans les départements du 06,11,13,30,34,48,66,83,84 | 2,588 |
| Divers jeux de données floristiques fournis par le CBN Alpin sur le TAG du CBNMed | 2,410 |
| Données d'inventaires et suivis des messicoles receuillies par NMP en Midi-Pyrénées | 2,398 |
| Divers jeux de données issues de la saisie des herbiers par le CBNMED | 2,386 |
| Divers jeux de données floristiques produits par le Syndicat des Hautes Vallées Cévenoles | 2,377 |
| PASS_Flore_CORIEAULYS | 2,363 |
| Divers jeux de données floristiques produits dans le cadre du programme RESEDA-Flore | 2,321 |
| Divers jeux de données flore sur l'ex région LR en provenance du bureau d'études Carex | 2,191 |
| Flore SULMONT | 2,180 |
| Divers jeux de données floristiques de l'agence nat. de sécurité sanitaire, de l'environnement et du travail - Labo Santé des Vgtx | 2,022 |
| Données flore produites dans le cadre de l'ABC Camargue gardoise | 2,014 |
| Relevés phytosociologiques produits par le CBNMed pour la conception de la typologie des sites Natura 2000 'Etangs Palavasiens' et 'Etang de l'Or | 1,993 |
| Inventaires réalisés par le CBNPMP dans la RNR d'Aulon | 1,981 |
| Divers jeux de données flore sur l'ex région LR en provenance du Bureau d'études Ecotone | 1,947 |
| Inventaires réalisés par les opérateurs Natura 2000 dans le cadre des DOCOB en Midi-Pyrénées | 1,932 |
| Diverses données floristiques issues de structures publiques dans les départements du 06, 11, 13, 30, 34, 48, 66, 83, 84 | 1,914 |
| Données d'inventaires et suivis des messicoles receuillies par le PNR HL en Midi-Pyrénées | 1,888 |
| Données naturalistes de Paul ROUVEYROL | 1,883 |
| Inventaire des végétations et habitats péri-aquatiques dans le secteur de plaine de Midi-Pyrénées par le CBNPMP | 1,848 |
| Import données Baznat flore | 1,799 |
| Inventaires floristiques produits par le CBNMED sur la RN du Bagnas | 1,783 |
| Dépouillements bibliographiques réalisées par le CBNPMP | 1,767 |
| CS Le Trabet | 1,688 |
| Vegetation surveys in mountainous area (Pyrenees, France) | 1,554 |
| Divers jeux de données flore sur l'ex région LR en provenance du bureau d'études NATURAE Groupe LAMO | 1,471 |
| Observations faunistiques et floristiques - Inventaires 2020 | 1,451 |
| Flore - Inventaire non standardisé. | 1,440 |
| Inventaires Aéro Biodiversité - DCM - Observation opportuniste tous règnes confondus | 1,410 |
| Etude prairies fleuries | 1,392 |
| Inventaires Aéro Biodiversité - TLS - Observation opportuniste tous règnes confondus | 1,375 |
| Données d'inventaires et suivis des messicoles receuillies par le CEN MP en Midi-Pyrénées | 1,373 |
| Inventaires Aéro Biodiversité - PGF - Observation opportuniste tous règnes confondus | 1,358 |
| Relevés phytosiociologiques ciblés sur les végétations aquatiques et riveraines | 1,354 |
| Observations d'Ambroisie à feuilles d'armoise (Ambrosia artemisiifolia) et d'Ambroisie trifide (Ambrosia trifida) | 1,343 |
| Contact aléatoire tout règnes confondus, jdd accessible par tous | 1,332 |
| Inventaires du CBNPMP sur les vieilles forêts pyrénéennes | 1,302 |
| Données naturalistes de DUSOULIER François | 1,280 |
| ENS Département du Gard - Données opportunistes agents de terrain | 1,233 |
| Données flore produites dans le cadre de l'ABC de Pouzols | 1,194 |
| Observations NEO (saisies avec l'outil géonature OccTax) | 1,185 |
| Recherche de taxons rares ou menacées de plantes vasculaires de la sous-trame milieux humides de Midi-Pyrénées | 1,185 |
| Système d’évaluation de l’état des Eaux (SEEE) - Macrophytes | 1,177 |
| Observations de plantes exotiques envahissantes réalisées par le CBNPMP | 1,165 |
| Flore - Inventaire non standardisé | 1,139 |
| Divers jeux de données floristiques produits par l'Office national des forêts dans les départements du 06, 11, 13, 30, 34, 48, 66, 83, 84 | 1,111 |
| Divers jeux de données floristiques produits par le Syndicat mixte de la Camargue gardoise | 1,094 |
| ABC Argeles-Gazost | 1,089 |
| Divers jeux de données flore en provenance du bureau d'études MTDA dans les départements du 06,11,13,30,34,48,66,83,84 | 1,079 |
| Divers jeux de données floristiques produits en ex LR par la Société d'Etude des Sciences de l'Aude | 1,019 |

| **Table S2:** Databases used for modeling the diversity of butterflies (Rhopalocera) (n = 1,106,770). | |
| --- | --- |
| **Database name** | **Number of observations** |
| Données CEN L-R Papillons/Libellule | 310,072 |
| Données opportunistes du CEN Midi-pyrenees | 186,760 |
| Versement collectif Faune Occitanie 2020 amphibiens, reptiles, mammifères | 119,679 |
| Données des Lépidoptères de France issues du Portail Artemisiae | 106,594 |
| Import données Baznat invert | 70,212 |
| Observation.org, Nature Data from around the world | 61,860 |
| Données de l'Atlas écologique régional des papillons de jour et zygènes | 46,559 |
| Suivi Temporel des Rhopalocères de France (STERF) | 22,862 |
| INaturalist Reasearch-grade Observations | 22,038 |
| données EE pour l'atlas biodiv'occitanie | 19,191 |
| Données Observatoire des Papillons des Jardins | 18,941 |
| Données opportunistes du CEN Languedoc-Roussilon | 13,854 |
| Suivi Photographique des Insectes Pollinisateurs (SPIPOLL) | 7,407 |
| Application INPN Espèces: Observations naturalistes, participatives et  opportunistes, fondées sur des photographies | 7,207 |
| Données acquises dans le cadre de l'activité du bureau d'étude BIOTOPE (1994 - 2013) | 6,535 |
| Données opportunistes du CEN Occitanie | 6,412 |
| Données invertébrés produites par l'OPIE | 6,073 |
| Observations occasionnelles Parc national des Pyrénées | 5,217 |
| Données ANA - CEN Ariège sur diverses études | 5,024 |
| Données invertébrés OPIE dans le cadre de la participation au réseau N2000 | 4,905 |
| ONF - Observations opportunistes et inventaires | 4,304 |
| Contact aléatoire tout règnes confondus, jdd accessible par tous | 3,999 |
| Atlas de la Biodiversité Communale sur le territoire du Parc National des Pyrénées - Données du CEN MP | 3,880 |
| Revue oreina [2008- ] | 3,878 |
| Données photographiques validées de la galerie du forum 'Le Monde des Insectes | 3,726 |
| Données zones humides CEN M-P | 3,649 |
| Données CEN L-R départements | 3,505 |
| Observations NEO (saisies avec l'outil géonature OccTax) | 3,329 |
| Données CEN M-P Milieux secs | 3,063 |
| Données ANA - CEN Ariège opportunistes | 2,936 |
| Insectes - Inventaire non protocolé | 2,923 |
| Données Protocole Papillons Gestionnaires (PROPAGE) | 2,368 |
| observado | 2,189 |
| Jeu de données personnel de Lock Jude | 2,117 |
| Données CEN M-P appui réserves naturelles | 2,100 |
| Données invertébrés dans le cadre de la participation au réseau N2000 | 1,984 |
| Jeu de données personnel de Urrustoy Etienne | 1,417 |
| Données CEN M-P - EDF | 1,306 |
| Données appui collectivités territoriales CEN L-R | 1,232 |
| Données invertébrés sites CEN MP | 1,227 |
| Données invertébrés sites CEN-LR | 1,110 |
| Natural History Museum Rotterdam - Specimens | 1,106 |
| Données OPIE partenariats PNR | 1,011 |
| Données OPIE Compensation collectivités | 1,009 |

| **Table S3:** Databases used for modeling bird diversity (Aves) (n = 4,765,000) | |
| --- | --- |
| **Database name** | **Number of observations** |
| Données opportunistes OISEAUX de Faune-Occitanie | 3,333,951 |
| Données Oiseaux des Jardins | 480,715 |
| Données STOC-EPS | 235,438 |
| EOD - eBird Observation Dataset | 214,361 |
| Import données Baznat oiseaux | 150,436 |
| Observation.org, Nature data from around the World | 52,356 |
| Données SHOC | 29,577 |
| Données Birdlab | 23,570 |
| Données Oiseaux dans le cadre de la participation au réseau N2000 | 20,429 |
| Données oiseaux dans le cadre des politiques publiques de départements | 15,878 |
| Oiseaux - Inventaire non protocolé | 14,384 |
| Données naturalistes de SWIFT Olivier | 13,965 |
| Données Oiseaux issues du programme régional de gestion de la sous-trame Milieux ouverts et semi-ouverts dans sa composante « semi-naturelle » | 13,391 |
| Données acquises dans le cadre de l'activité du bureau d'étude BIOTOPE (1994 - 2013) | 12,859 |
| Données Oiseaux issues de la gestion de site ou d'appui à la gestion de site | 10,977 |
| iNaturalist Research-grade Observations | 10,881 |
| Observations occasionnelles Parc national des Pyrénées | 10,080 |
| Données Oiseaux issues des mesures compensatoires de projets portés par les collectivités territoriales | 8,781 |
| Contact aléatoire tout règnes confondus, jdd accessible par tous | 7,576 |
| ONF - Observations opportunistes et inventaires | 7,191 |
| Données d'observations 'espèce' réalisées par des agents de l'OFB jusqu'au 31 décembre 2018. | 7,046 |
| Données Oiseaux issues de l'appui au Parcs Naturels Régionaux | 6,114 |
| Application INPN Espèces: Observations naturalistes, participatives et opportunistes, fondées sur des photographies | 6,070 |
| Observations NEO (saisies avec l'outil géonature OccTax) | 5,804 |
| [HORS_PROTOCOLE] - Contributions à la connaissance sur la biodiversité du Parc National des Pyrénées | 5,762 |
| Inventaire et suivis d'espèces dans le Parc national des Cévennes | 5,570 |
| Données Oiseaux de Nîmes Métropole versées au SINP | 5,460 |
| Données Oiseaux issues de la mise en oeuvre des suivis compensatoires de propriétaires privés ou partenariat public-privé | 5,030 |
| Xeno-canto - Bird sounds from around the world | 4,372 |
| naturgucker | 3,781 |
| Données Oiseaux dans le cadre de l'appui au réserves naturelles | 3,481 |
| JDD faune - Projet TEREGA REVA - Renouvellement Villariès Albi | 3,302 |
| [OISEAUX] - STOC | 3,199 |
| [ABC] - PNP - Inventaire Faune-Flore-Fonge | 2,180 |
| Plan National d'Actions Outarde canepetière | 2,105 |
| Visiolittoral : surveillance naturaliste des sites du Conservatoire du littoral | 1,942 |
| Données Oiseaux issues des mesures compensatoires routes départementales | 1,714 |
| Suivi post implantation Truc de l'Homme 2018-2019 | 1,613 |
| Programme FLASH : Répartition Merle noir 2012 - 2016 Coordonnées GPS Lambert 93 | 1,539 |
| Jeu de données personnel de Bergès Christophe | 1,530 |
| Données Oiseaux issues des mesures compensatoires voies ferrées | 1,521 |
| Données naturalistes de Benoit FONTAINE | 1,400 |
| Oiseaux - Inventaire protocolé | 1,357 |
| Suivi LIFE+ Envoll | 1,354 |
| Données naturalistes de Julien BIRARD | 1,298 |
| Programme FLASH : Répartition Etourneau sansonnet 2012 - 2016 Coordonnées GPS Lambert 93 | 1,247 |
| Données brutes faune flore avifaune chiroptères | 1,233 |
| ABC Argeles-Gazost | 1,214 |
| [OISEAUX] - Oiseaux alpins communs - Suivi | 1,211 |
| Programme FLASH : Répartition Grive draine 2012 - 2016 Coordonnées GPS Lambert 93 | 1,195 |
| Données brutes de biodiversité | 1,135 |
| STMH_données opportunistes | 1,125 |
| Programme FLASH : Répartition Tourterelle turque 2012 - 2016 Coordonnées GPS Lambert 93 | 1,107 |
| Données oiseaux issues d'études d'impacts | 1,079 |
| Données brutes Avifaune - Ferme éolienne du Puech | 1,042 |
| Programme FLASH : Répartition Pigeon ramier 2012 - 2016 Coordonnées GPS Lambert 93 | 1,038 |
| Programme FLASH : Répartition Grive musicienne 2012 - 2016 Coordonnées GPS Lambert 93 | 1,034 |

| **Table S4:** Moran indices and robust Lagrange multipliers (SAR, SEM) for Tracheophyta (vascular plants), Rhopalocera (butterflies), Aves (birds) for the regional models with overall geodiversity. The lines highlighted in yellow correspond to the selected model (lowest AIC). | | | | | |
| --- | --- | --- | --- | --- | --- |
| Taxon | Scale (km) | Test | Statistical | AIC | p-value |
| ***Tracheophyta*** | *5* | Moran I | 0.576 |  | 0.00E+00 |
| Lagrange robuste SAR | 27.942 | 18248.31 | 1.25E-07 |
| Lagrange robuste SEM | 252.407 | 18124.78 | 0.00E+00 |
| *7.5* | Moran I | 0.577 |  | 0.00E+00 |
| Lagrange robuste SAR | 34.181 | 12238.70 | 5.01E-09 |
| Lagrange robuste SEM | 107.428 | 12174.37 | 0.00E+00 |
| *10* | Moran I | 0.572 |  | 0.00E+00 |
| Lagrange robuste SAR | 40.368 | 7755.65 | 2.10E-10 |
| Lagrange robuste SEM | 52.310 | 7714.31 | 4.73E-13 |
| ***Rhopalocera*** | *5* | Moran I | 0.343 |  | 0.00E+00 |
| Lagrange robuste SAR | 39.667 | 14901.82 | 3.01E-10 |
| Lagrange robuste SEM | 28.524 | 14941.46 | 9.25E-08 |
| *7.5* | Moran I | 0.417 |  | 0.00E+00 |
| Lagrange robuste SAR | 36.930 | 8322.68 | 1.22E-09 |
| Lagrange robuste SEM | 18.076 | 8334.92 | 2.12E-05 |
| *10* | Moran I | 0.435 |  | 0.00E+00 |
| Lagrange robuste SAR | 47.129 | 4941.58 | 6.64E-12 |
| Lagrange robuste SEM | 30.458 | 4953.54 | 3.411E-08 |
| ***Aves*** | *5* | Moran I | 0.491 |  | 0.00E+00 |
| Lagrange robuste SAR | 5.769 | 23338.66 | 0.016307 |
| Lagrange robuste SEM | 32.102 | 23244.23 | 1.462E-08 |
| *7.5* | Moran I | 0.501 |  | 0.00E+00 |
| Lagrange robuste SAR | 3.219 | 10447.40 | 0.0727 |
| Lagrange robuste SEM | 32.101 | 10387.37 | 1.463E-08 |
| *10* | Moran I | 0.502 |  | 0.00E+00 |
| Lagrange robuste SAR | 3.404 | 5749.96 | 0.06503 |
| Lagrange robuste SEM | 20.565 | 5728.77 | 5.76E-06 |

| **Table S5.** Moran indices and robust Lagrange multipliers (SAR, SEM) for Tracheophyta (vascular plants), Rhopalocera (butterflies), Aves (birds) for the regional models with the four components of geodiversity. The lines highlighted in yellow correspond to the selected model (lowest AIC). | | | | | |
| --- | --- | --- | --- | --- | --- |
| Taxon | Scale (km) | Test | Statistical | AIC | p-value |
| ***Tracheophyta*** | *5* | Moran I | 0.576 |  | 0.00E+00 |
| Lagrange robuste SAR | 28.420 | 18233.07 | 9.763E-08 |
| Lagrange robuste SEM | 248.412 | 18114.87 | 0.00E+00 |
| *7.5* | Moran I | 0.577 |  | 0.00E+00 |
| Lagrange robuste SAR | 33.171 | 12230.58 | 8.40E-089 |
| Lagrange robuste SEM | 110.740 | 12172.73 | 0.00E+00 |
| *10* | Moran I | 0.572 |  | 0.00E+00 |
| Lagrange robuste SAR | 42.987 | 7738.51 | 5.50E-11 |
| Lagrange robuste SEM | 56.246 | 7703.21 | 6.39E-14 |
| ***Rhopalocera*** | *5* | Moran I | 0.338 |  | 0.00E+00 |
| Lagrange robuste SAR | 42.998 | 14897.57 | 5.477E-11 |
| Lagrange robuste SEM | 25.896 | 14939.95 | 3.60E-07 |
| *7.5* | Moran I | 0.404 |  | 0.00E+00 |
| Lagrange robuste SAR | 45.533 | 8321.45 | 1.500E-11 |
| Lagrange robuste SEM | 13.891 | 8338.24 | 1.936E-04 |
| *10* | Moran I | 0.418 |  | 0.00E+00 |
| Lagrange robuste SAR | 53.364 | 4938.19 | 2.771E-13 |
| Lagrange robuste SEM | 25.450 | 4956.81 | 4.538E-07 |
| ***Aves*** | *5* | Moran I | 0.456 |  | 0.00E+00 |
| Lagrange robuste SAR | 56.317 | 23160.20 | 6.161E-014 |
| Lagrange robuste SEM | 63.499 | 23117.32 | 1.55E+15 |
| *7.5* | Moran I | 0.482 |  | 0.00E+00 |
| Lagrange robuste SAR | 28.373 | 10342.27 | 1.00E-07 |
| Lagrange robuste SEM | 46.893 | 10293.38 | 7.493E-12 |
| *10* | Moran I | 0.496 |  | 0.00E+00 |
| Lagrange robuste SAR | 15.556 | 5680.47 | 8.008E-05 |
| Lagrange robuste SEM | 32.167 | 5648.38 | 1.41E-08 |

| **Table S6:** Comparisons of the quality of fit of the spatial models (SAR, SEM) and the linear model for Tracheophyta (land plants), Rhopalocera (moth) and Aves (birds) in the model with all the components of geodiversity. | | | | | | | | |
| --- | --- | --- | --- | --- | --- | --- | --- | --- |
|
| Taxon | Scale (km) | Test | Coefficient  autoregression | p-value | AdjustedR² | AdjustedR² (lm) | AIC | AIC (lm) |
| ***Tracheophyta*** | *5* | SEM | 0.765 | <0.001 | 0.663 | 0.204 | 18114.871 | 18978.264 |
| *7.5* | 0.869 | <0.001 | 0.774 | 0.346 | 12172.733 | 12910.690 |
| *10* | 0.894 | <0.001 | 0.825 | 0.424 | 7703.217 | 8227.000 |
| ***Rhopalocera*** | *5* | SAR | 0.523 | <0.001 | 0.481 | 0.288 | 14897.577 | 15307.878 |
| *7.5* | 0.663 | <0.001 | 0.661 | 0.449 | 8321.450 | 8705.031 |
| *10* | 0.707 | <0.001 | 0.746 | 0.535 | 4938.194 | 5237.043 |
| ***Aves*** | *5* | SEM | 0.785 | <0.001 | 0.590 | 0.139 | 23117.328 | 24384.374 |
| *7.5* | 0.841 | <0.001 | 0.648 | 0.159 | 10293.382 | 10978.452 |
| *10* | 0.861 | <0.001 | 0.682 | 0.175 | 5648.383 | 6057.333 |

**Fig. S1** : Schematic representation of the principles of geographically weighted regression, modified by Feuillet et al (2019)


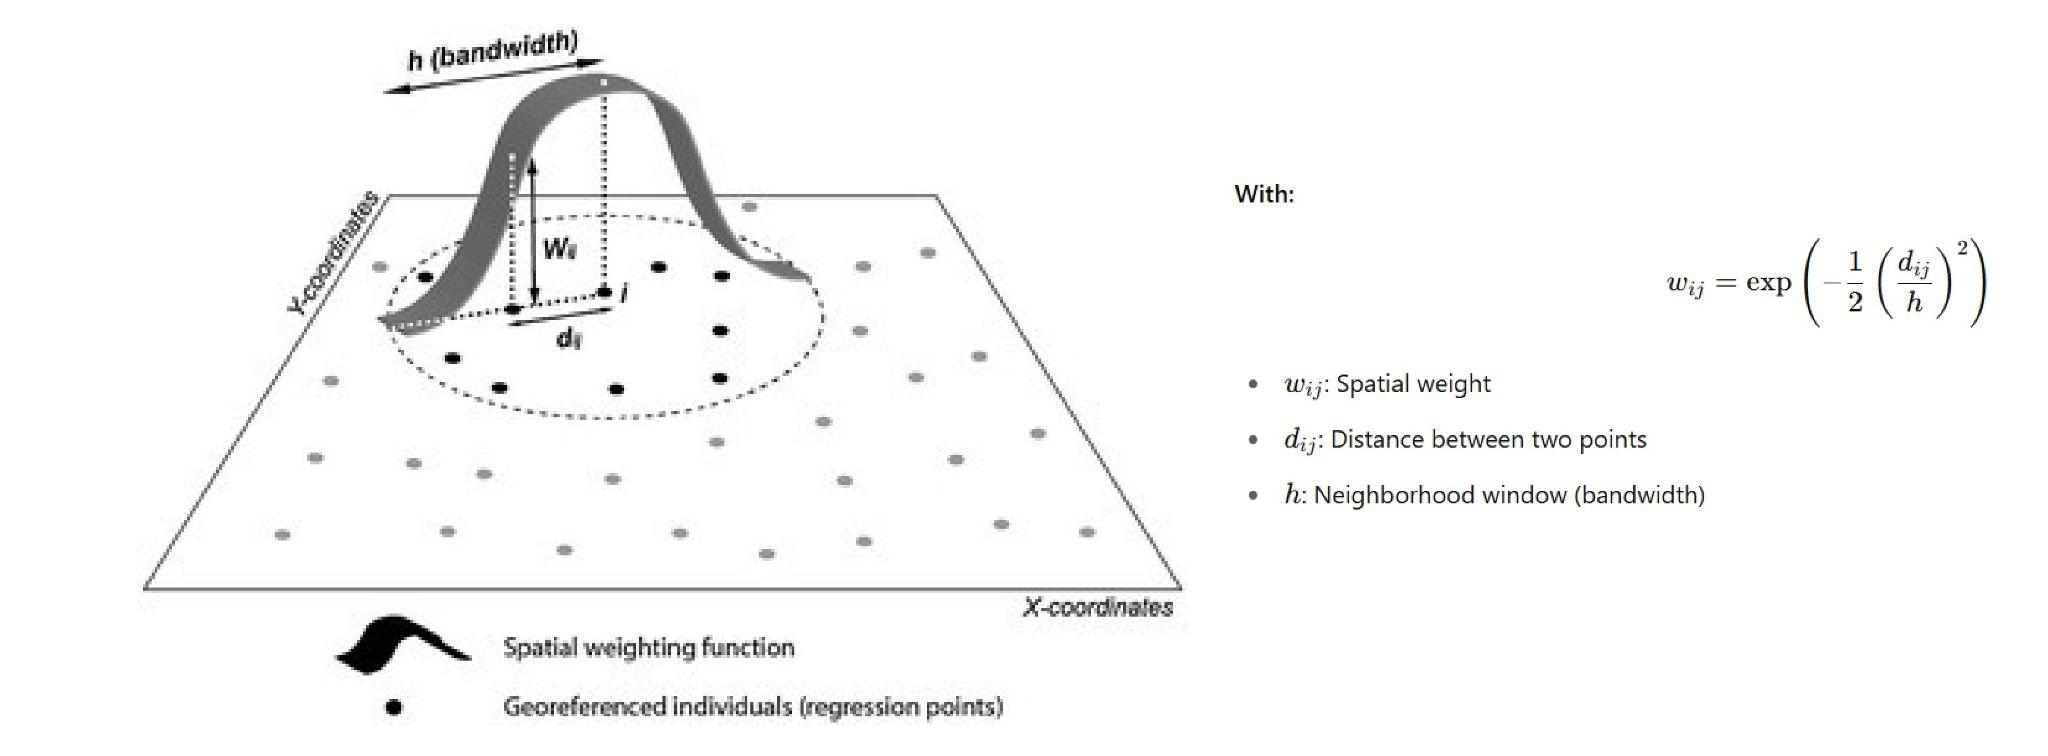


**Fig. S2.** Maps of geological, pedological, hydrological, and geomorphological diversity and resulting overall geodiversity at the three spatial scales considered: 5 (A), 7.5 (B), and 10 km (C) grid resolution.

**A- Grid of 5 km**


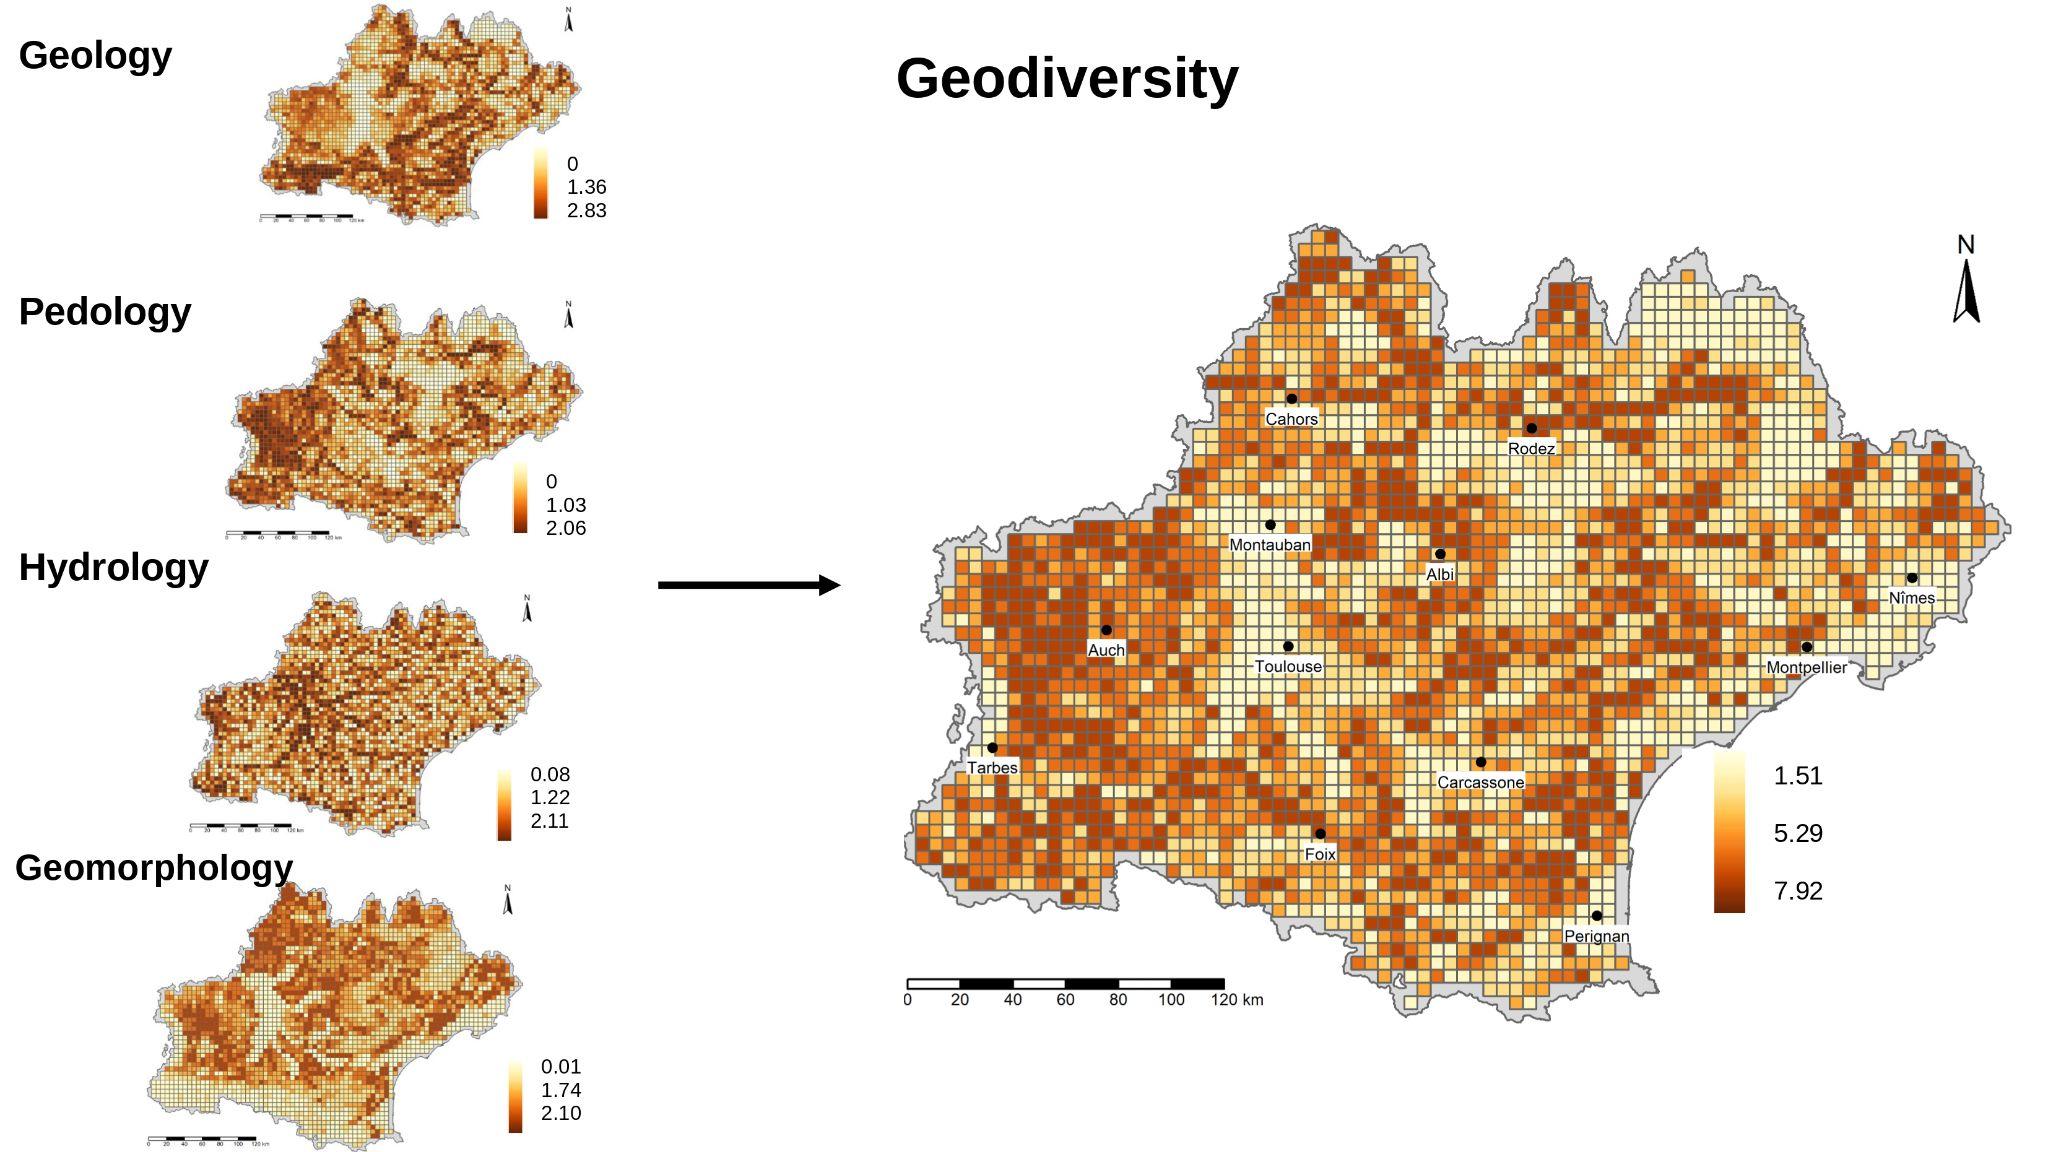


**D- Grid of 7.5 km**


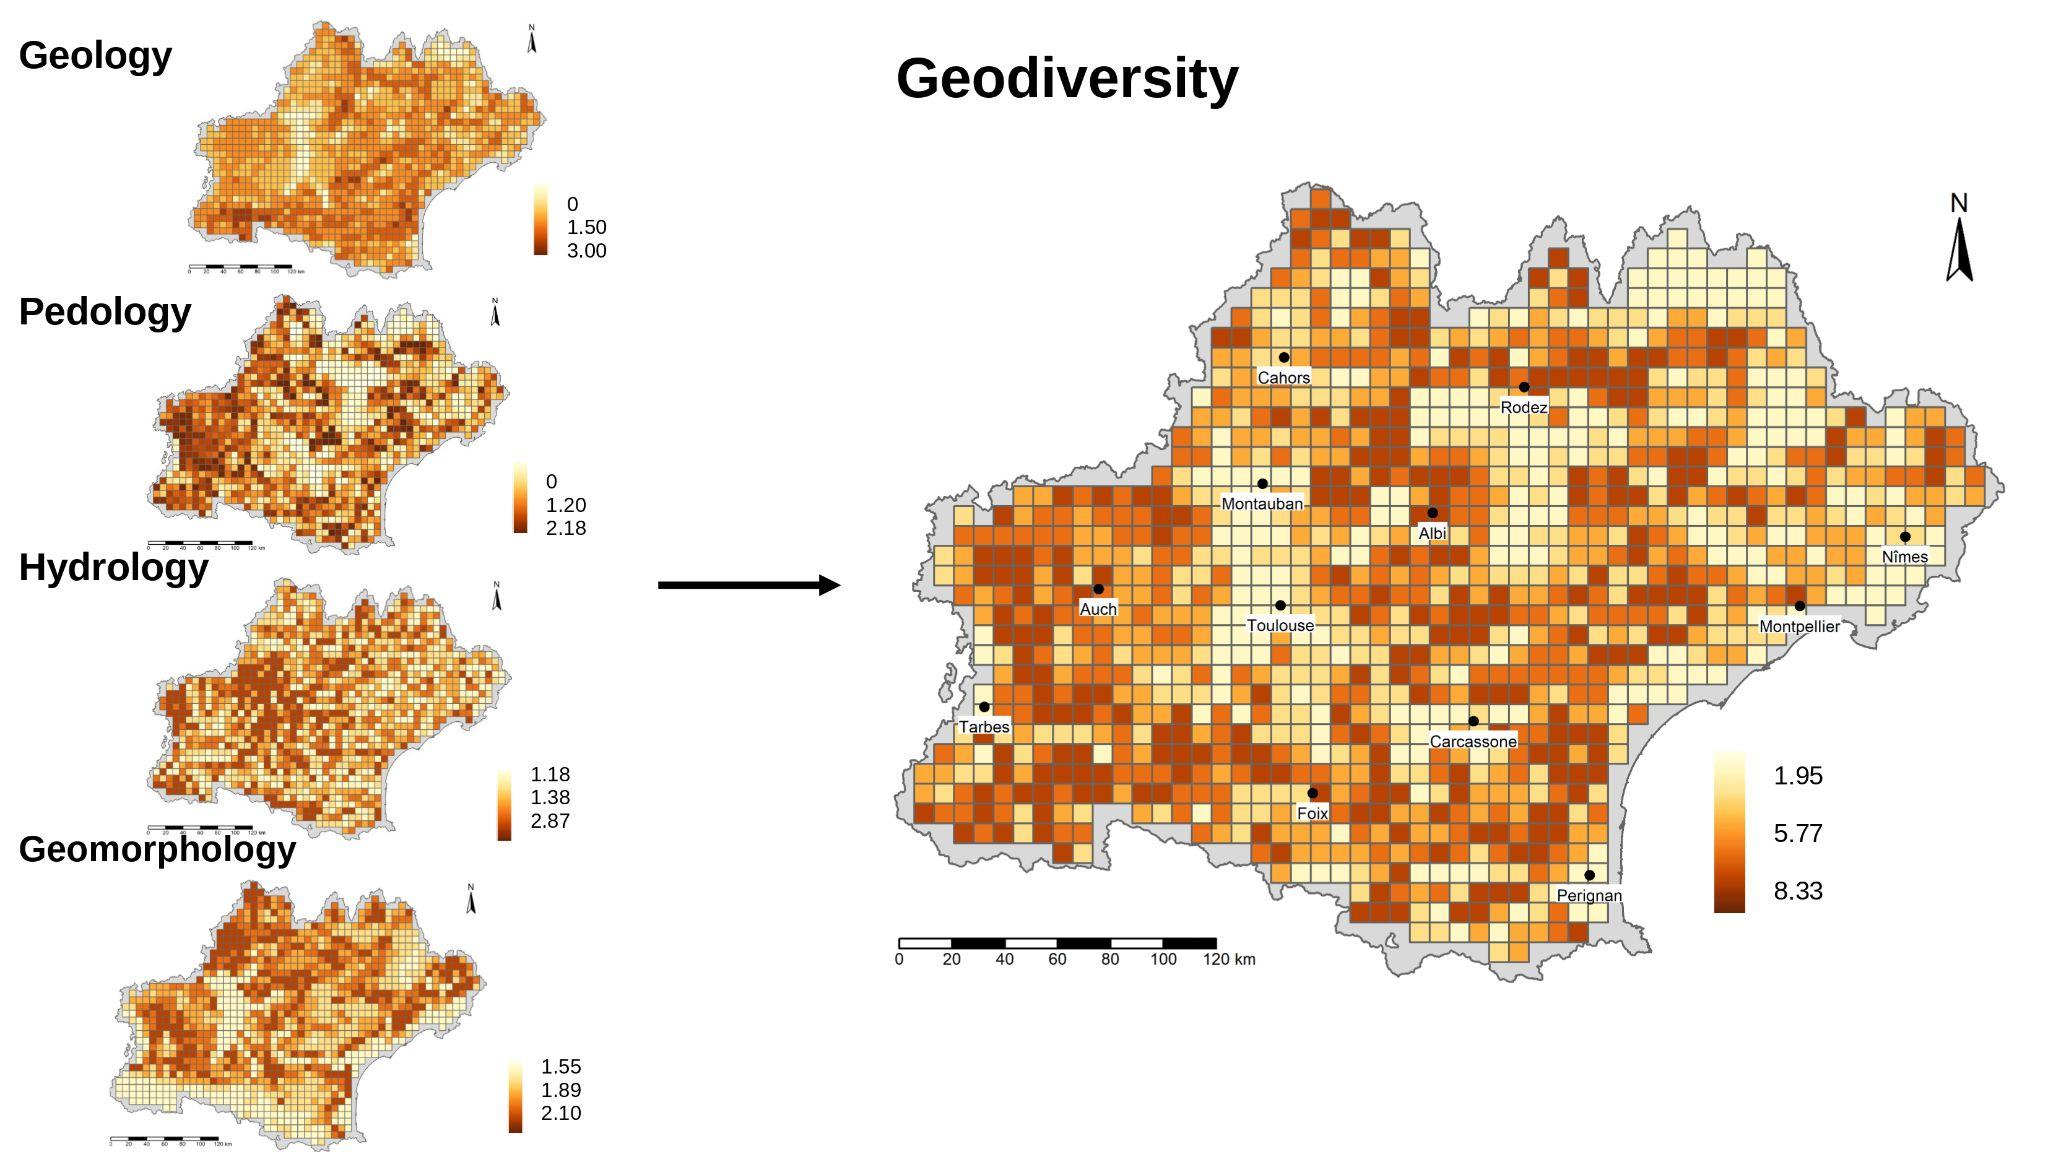


**C- Grid of 10 km**


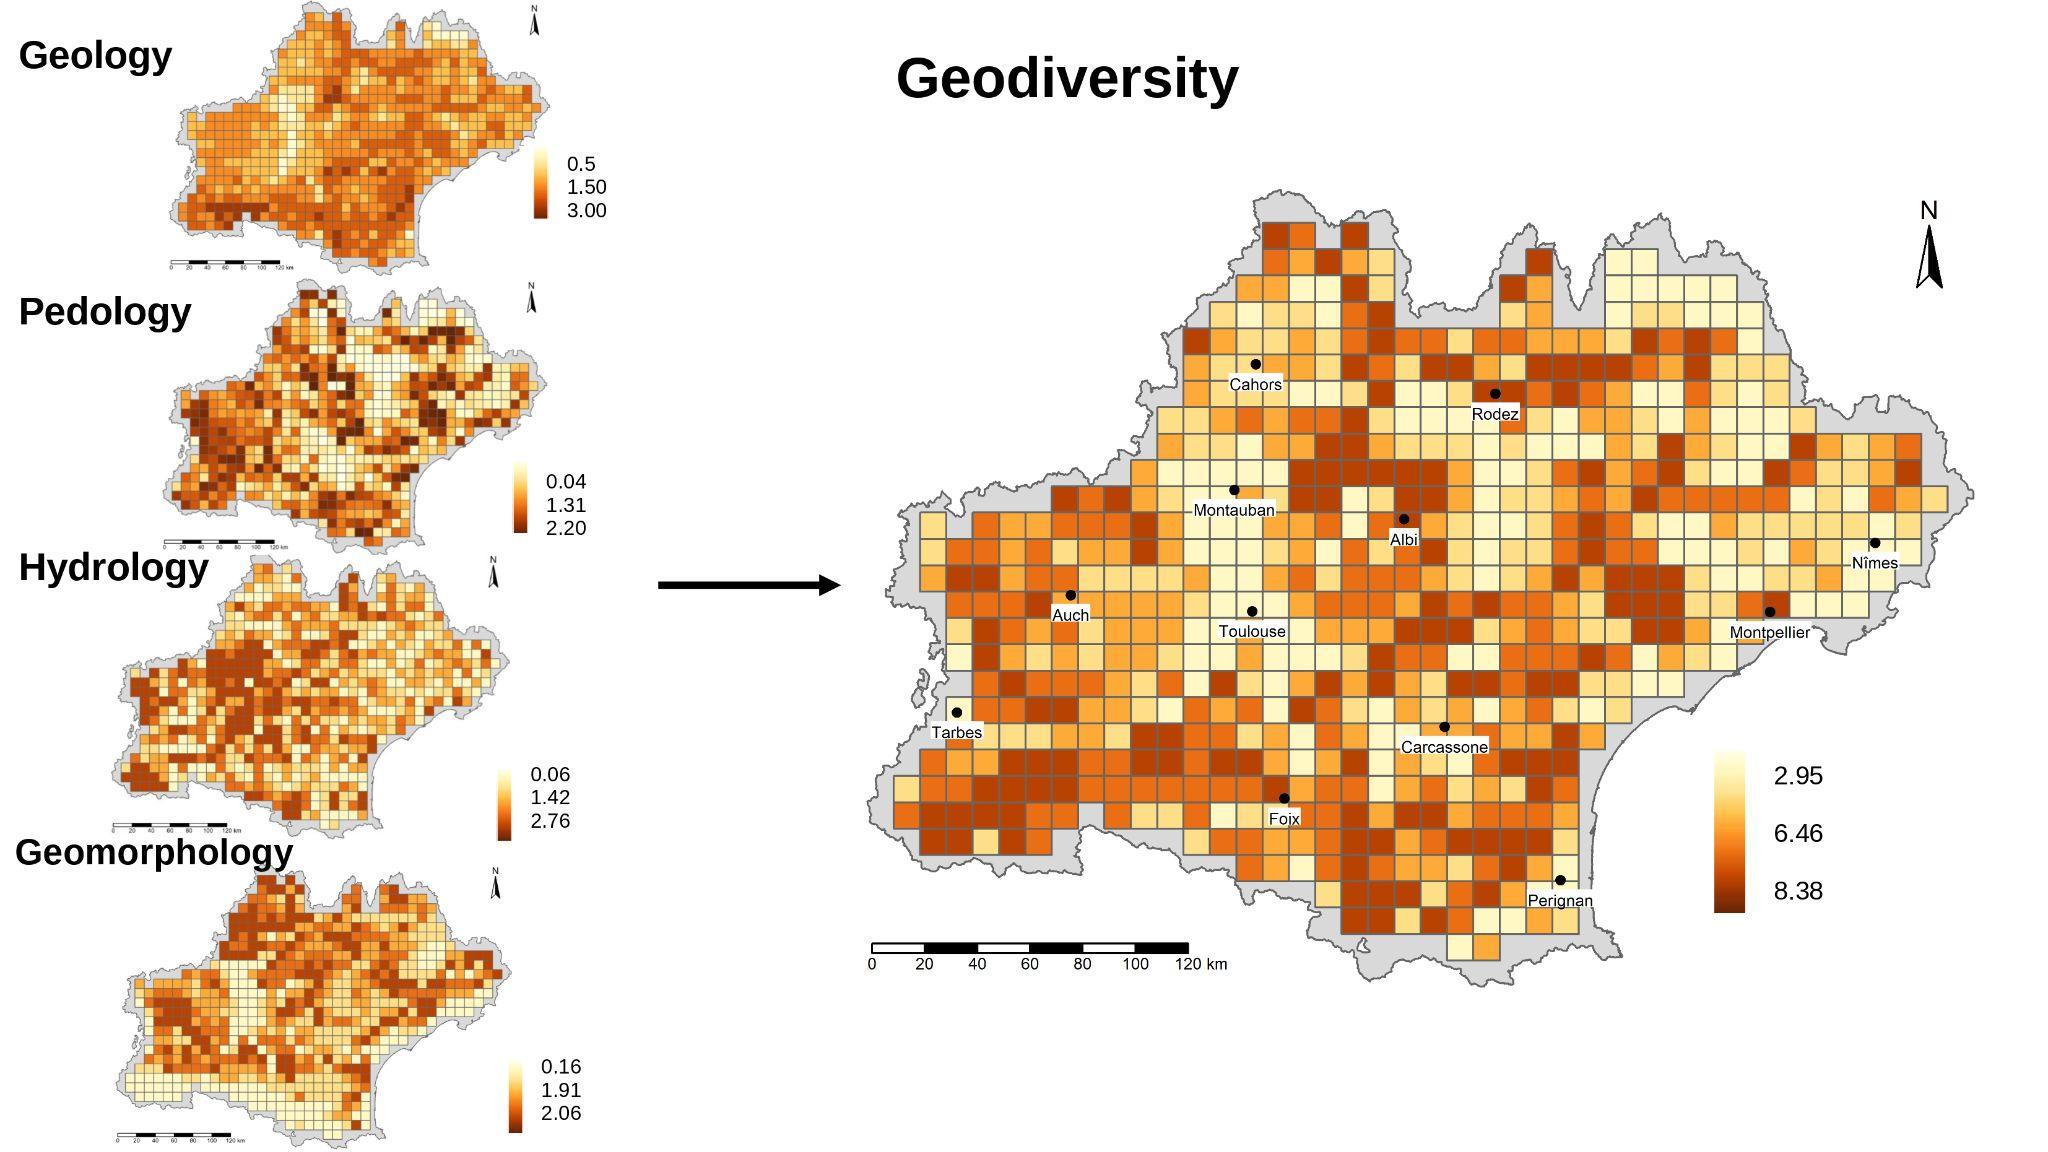


**Fig.S3** Maps of the residuals of the linear model for the three taxa at the three spatial scales considered: 5 (A), 7.5 (B), and 10 km (C) grid resolution.

**A- Grid of 5 km**


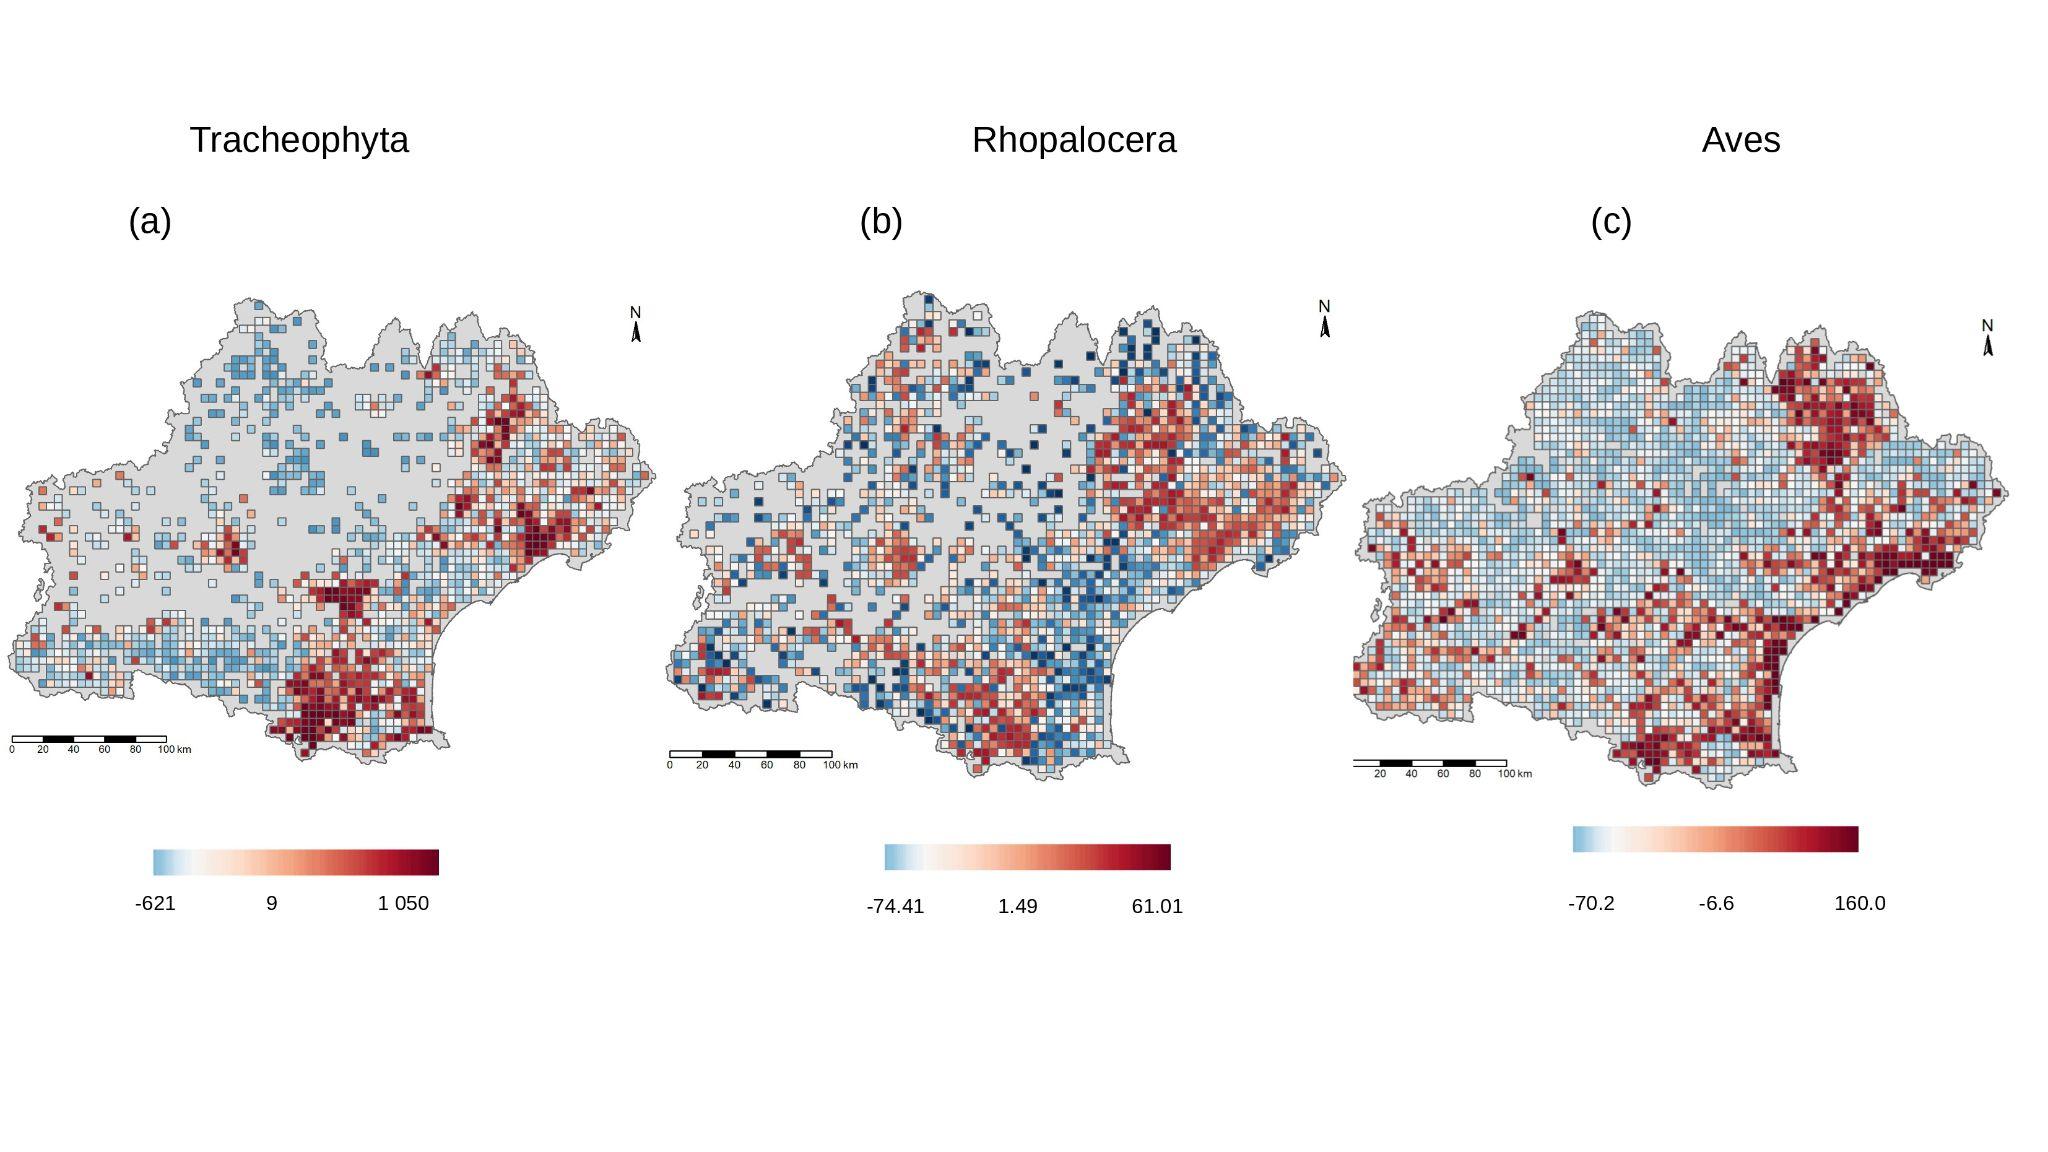
**B- Grid of 7.5 km**


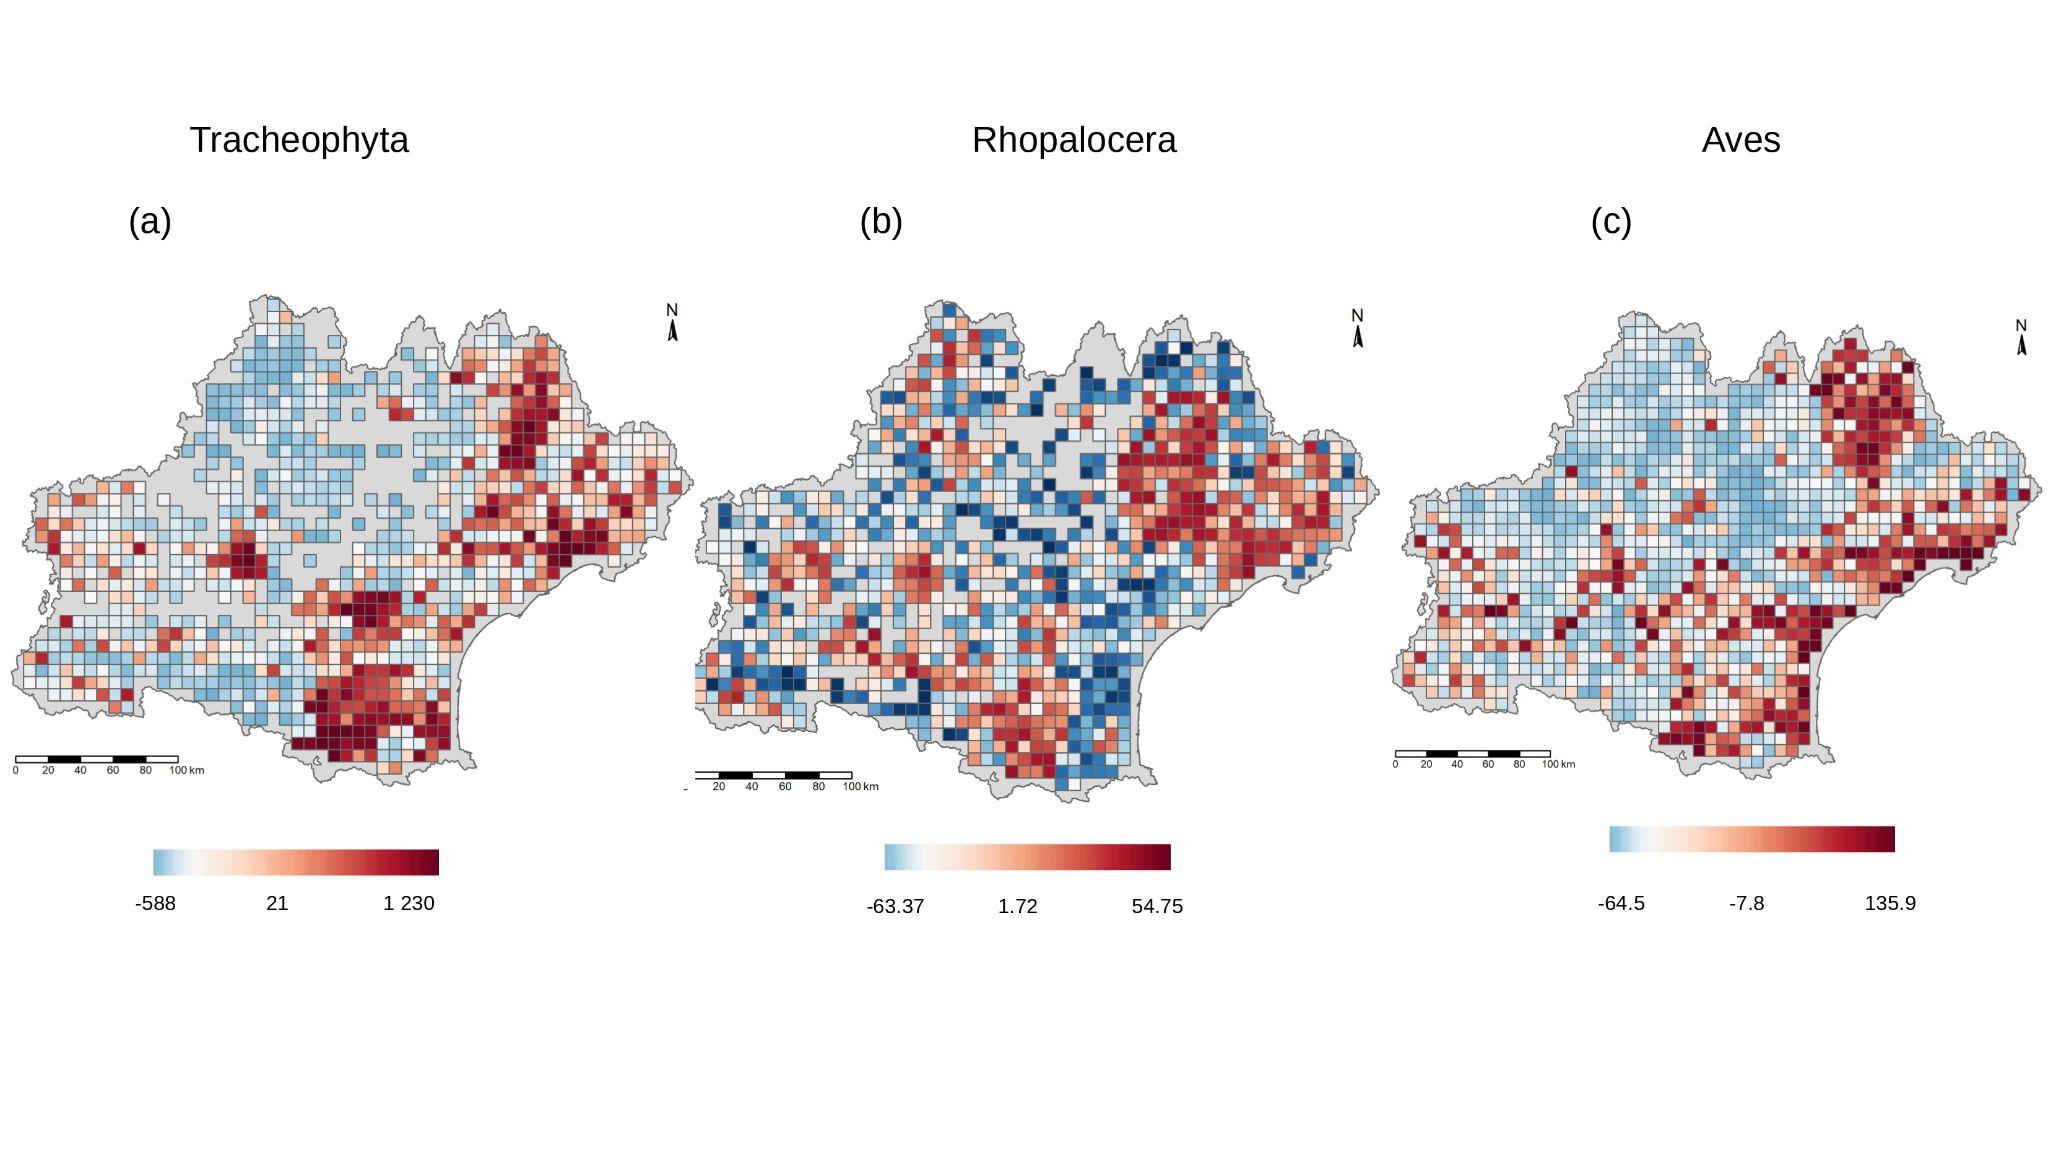


**C- Grid of 10 km**


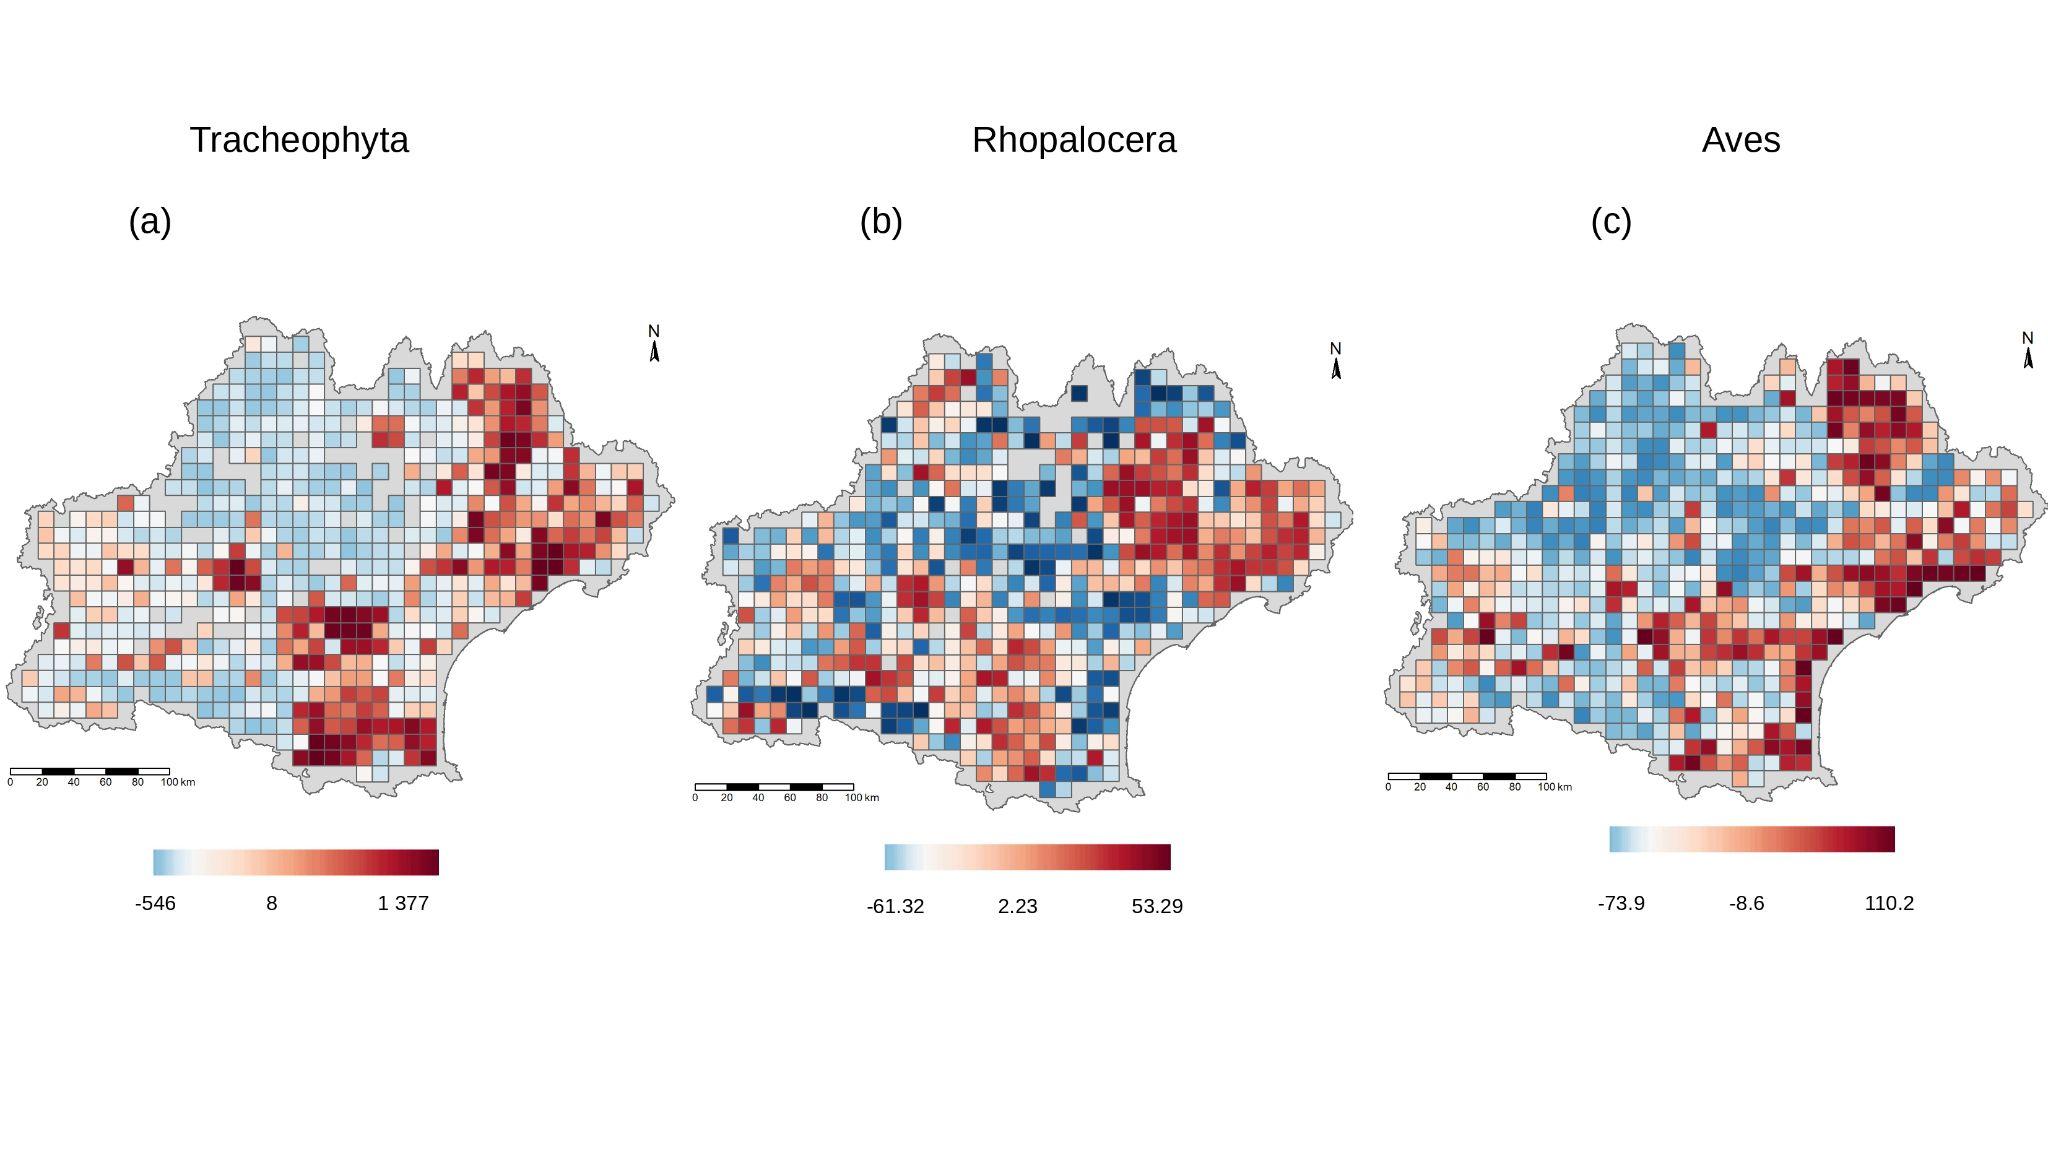


**Fig. S4**: Maps of the residuals of the best spatially corrected model (SAR or SEM) for the three taxa at the three spatial scales considered: 5 (A), 7.5 (B), and 10 km (C) grid resolution.

**A- Grid of 5 km**


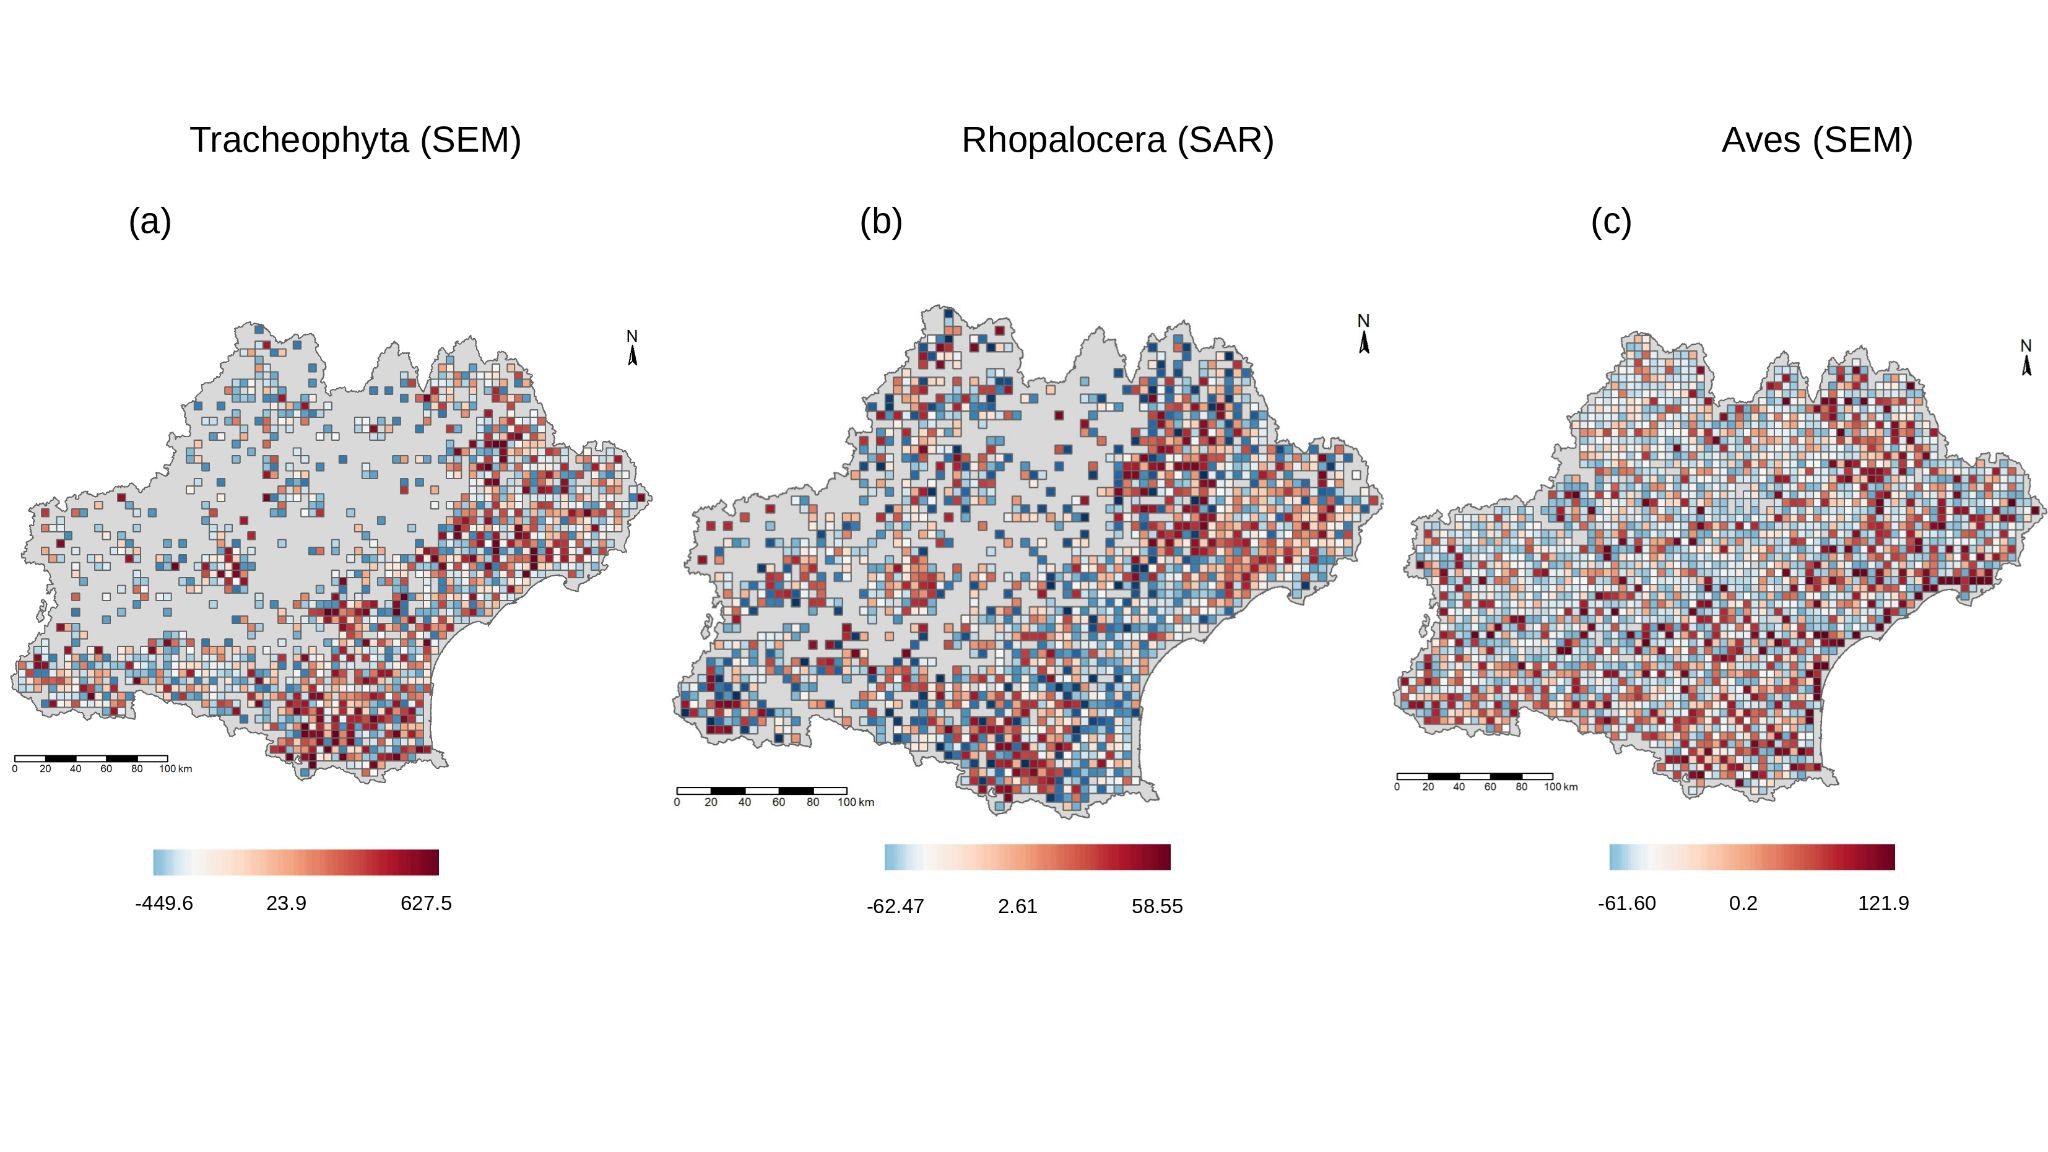


**B- Grid of 7.5 km**


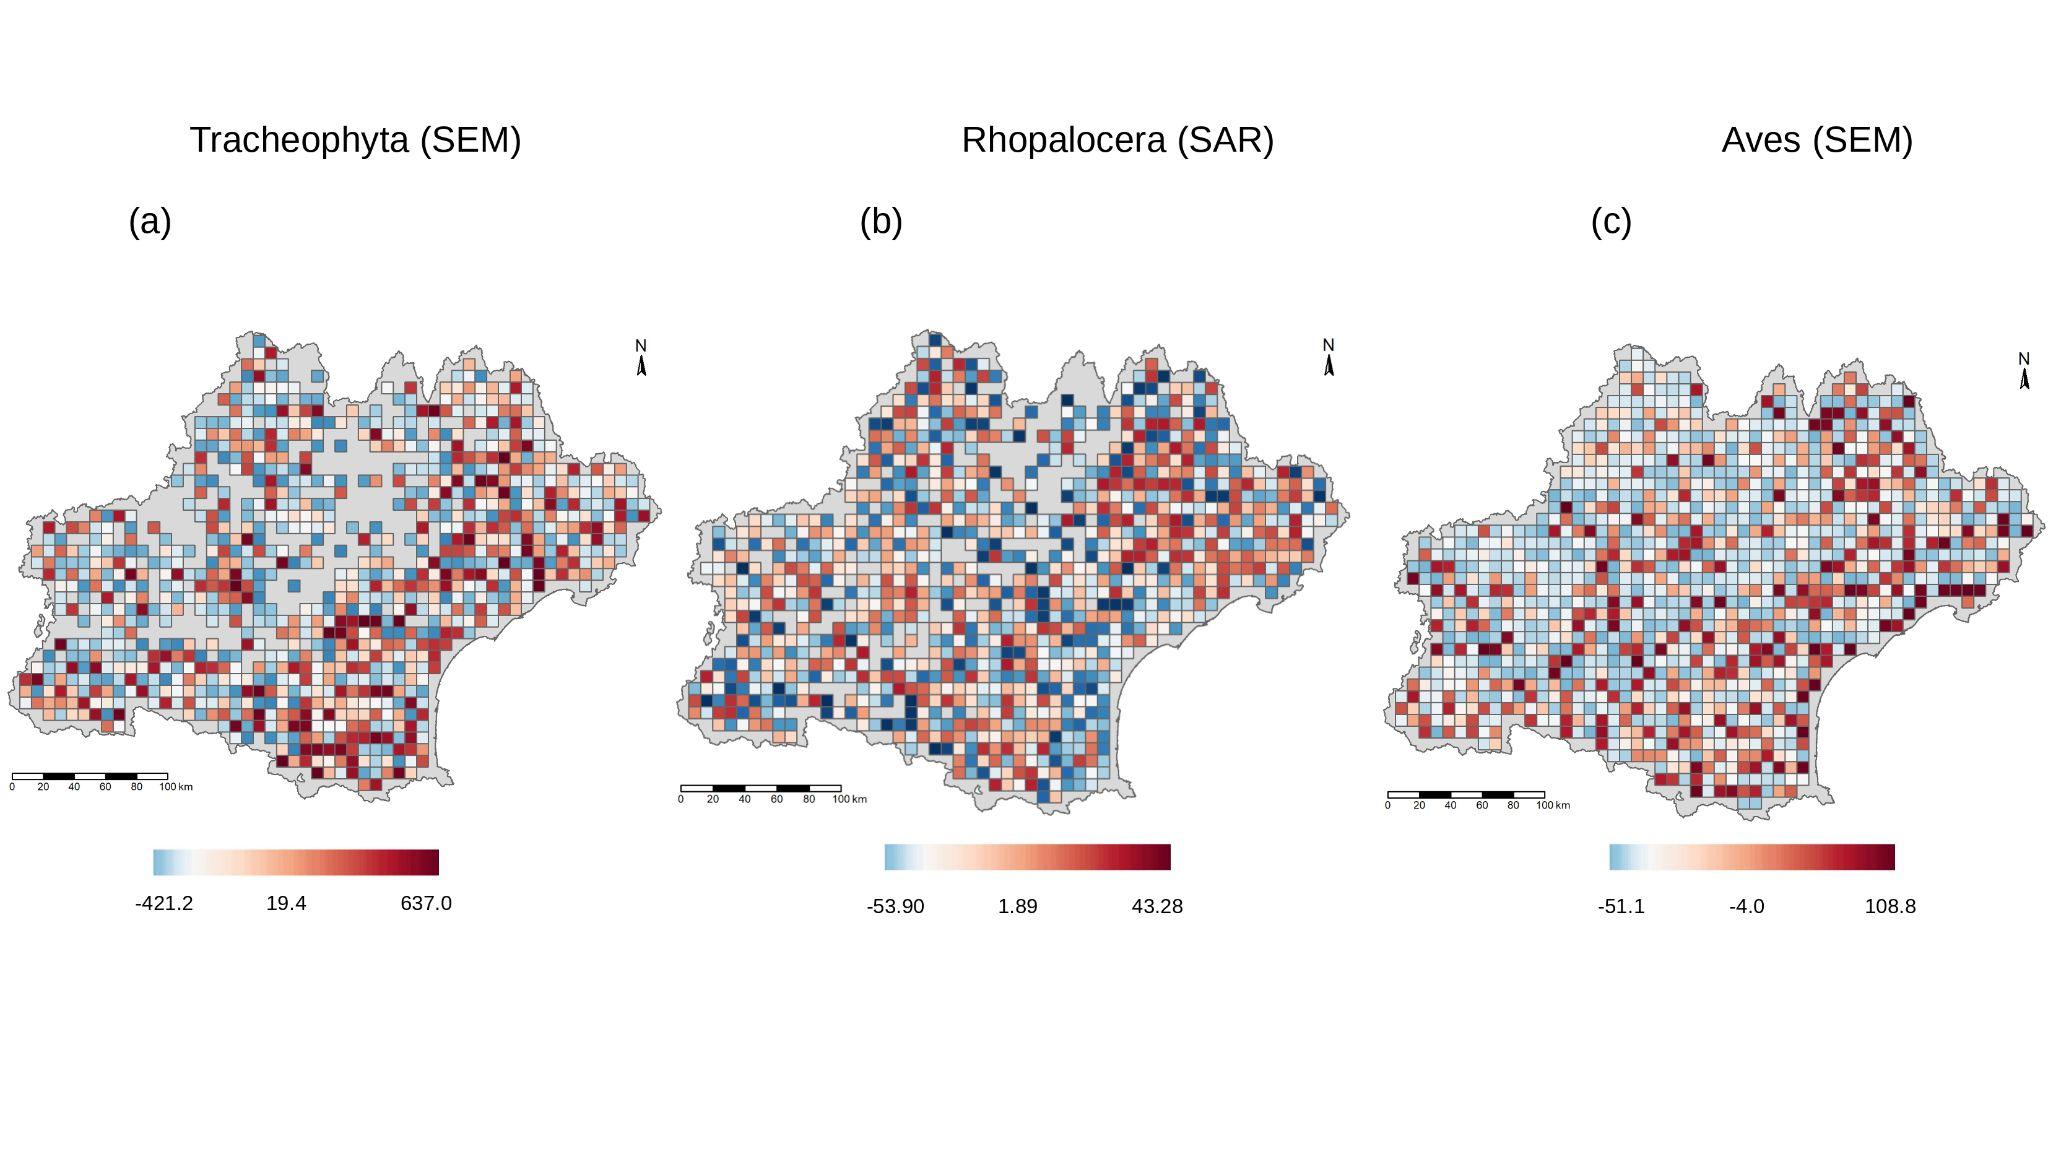


**B- Grid of 10 km**


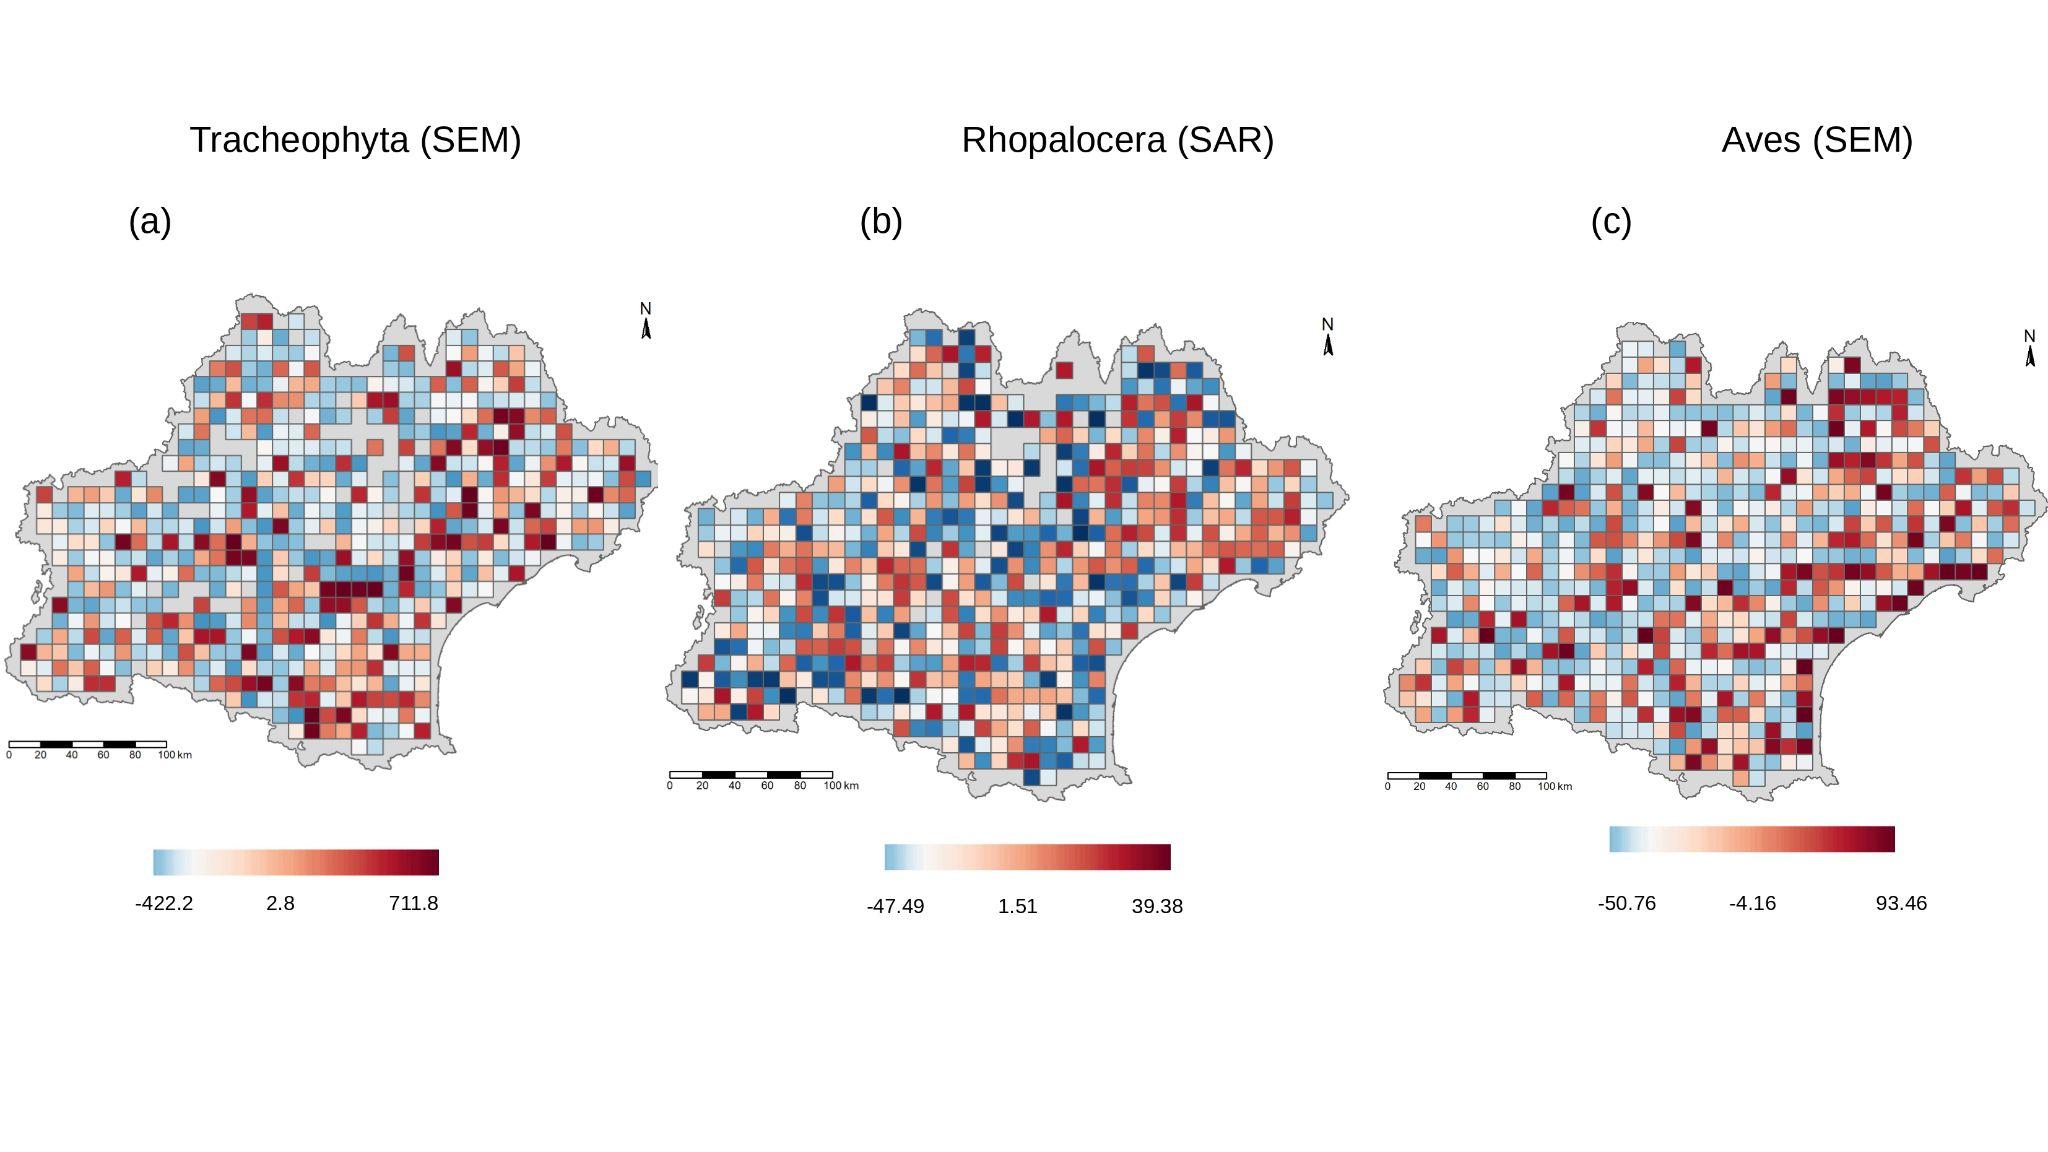


**Fig.S5**: Maps of the value of abiotic coefficients following GWR for vascular plants (A) butterflies (B) and birds (C) at the three spatial scales considered: 5, 7.5, and 10 km grid resolution.

**A- Plants**

**Grid of 5 km**

**
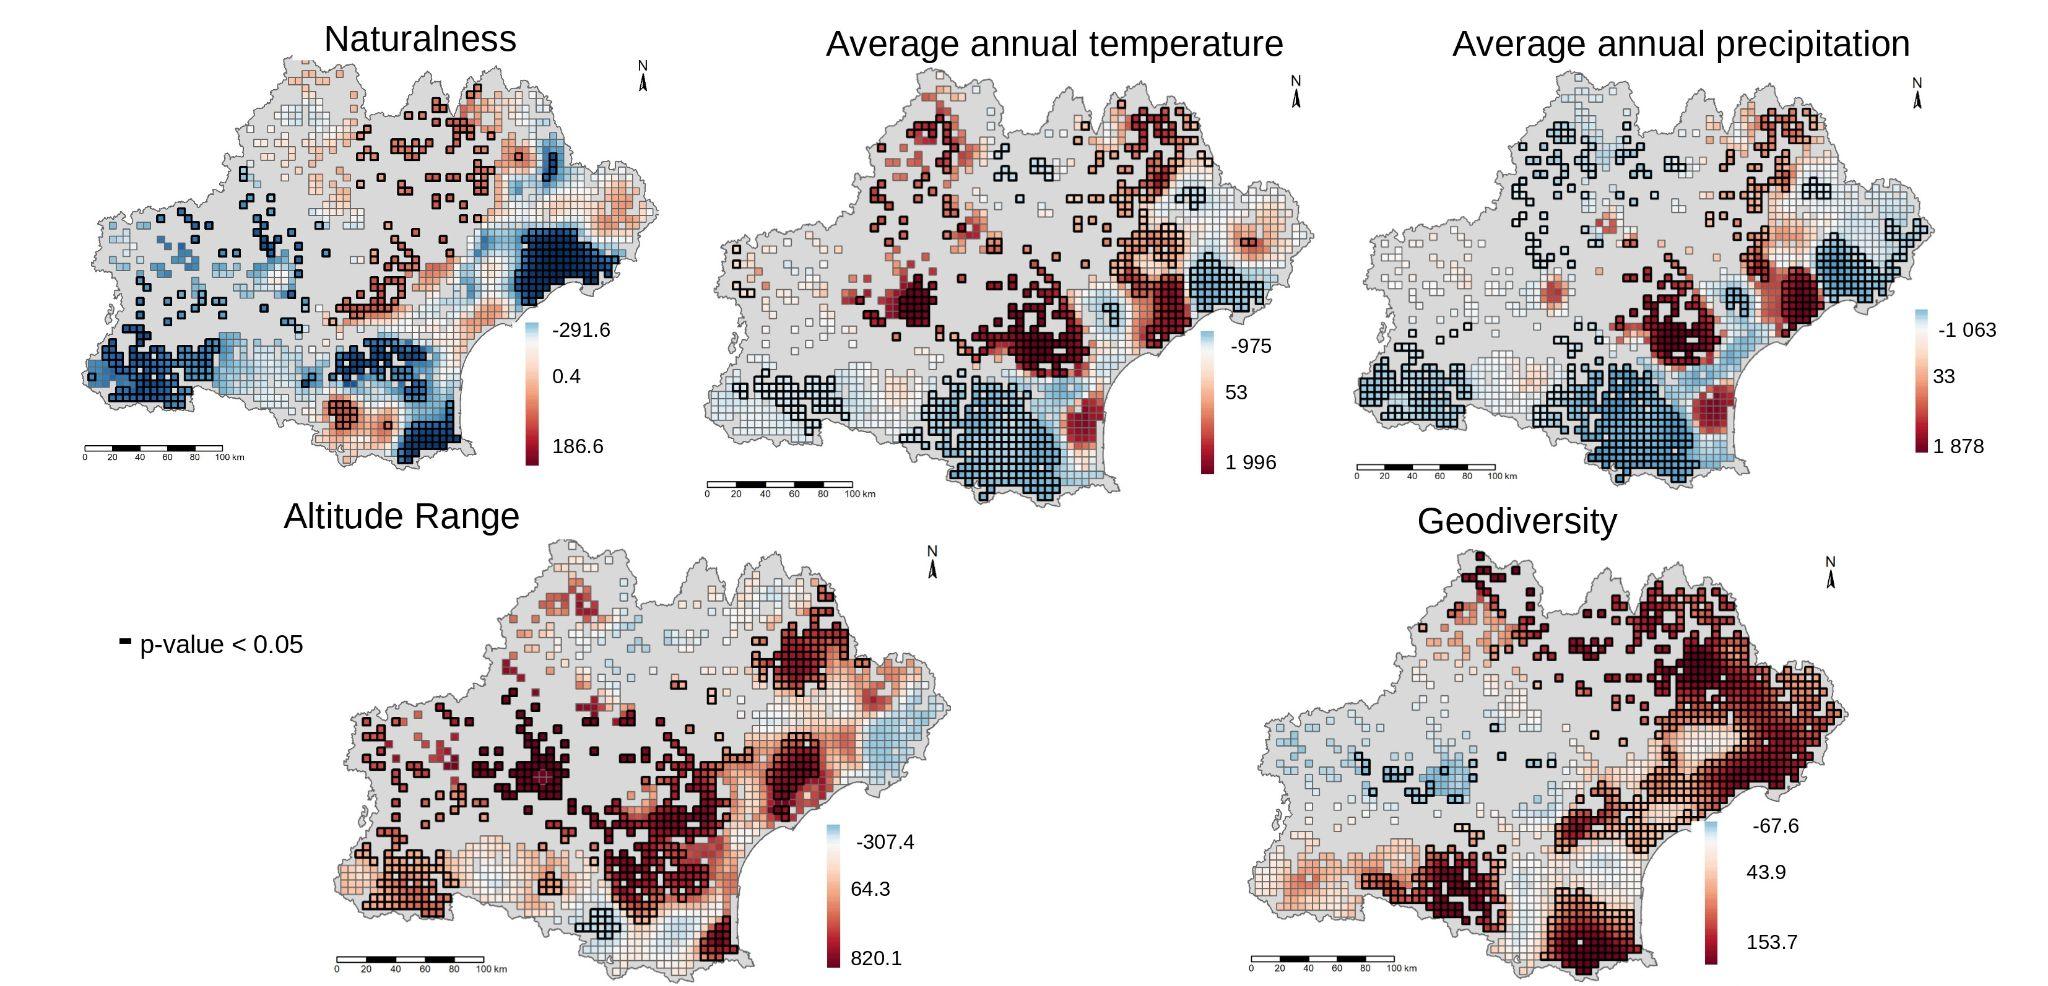
**

**Grid of 7.5 km**

**
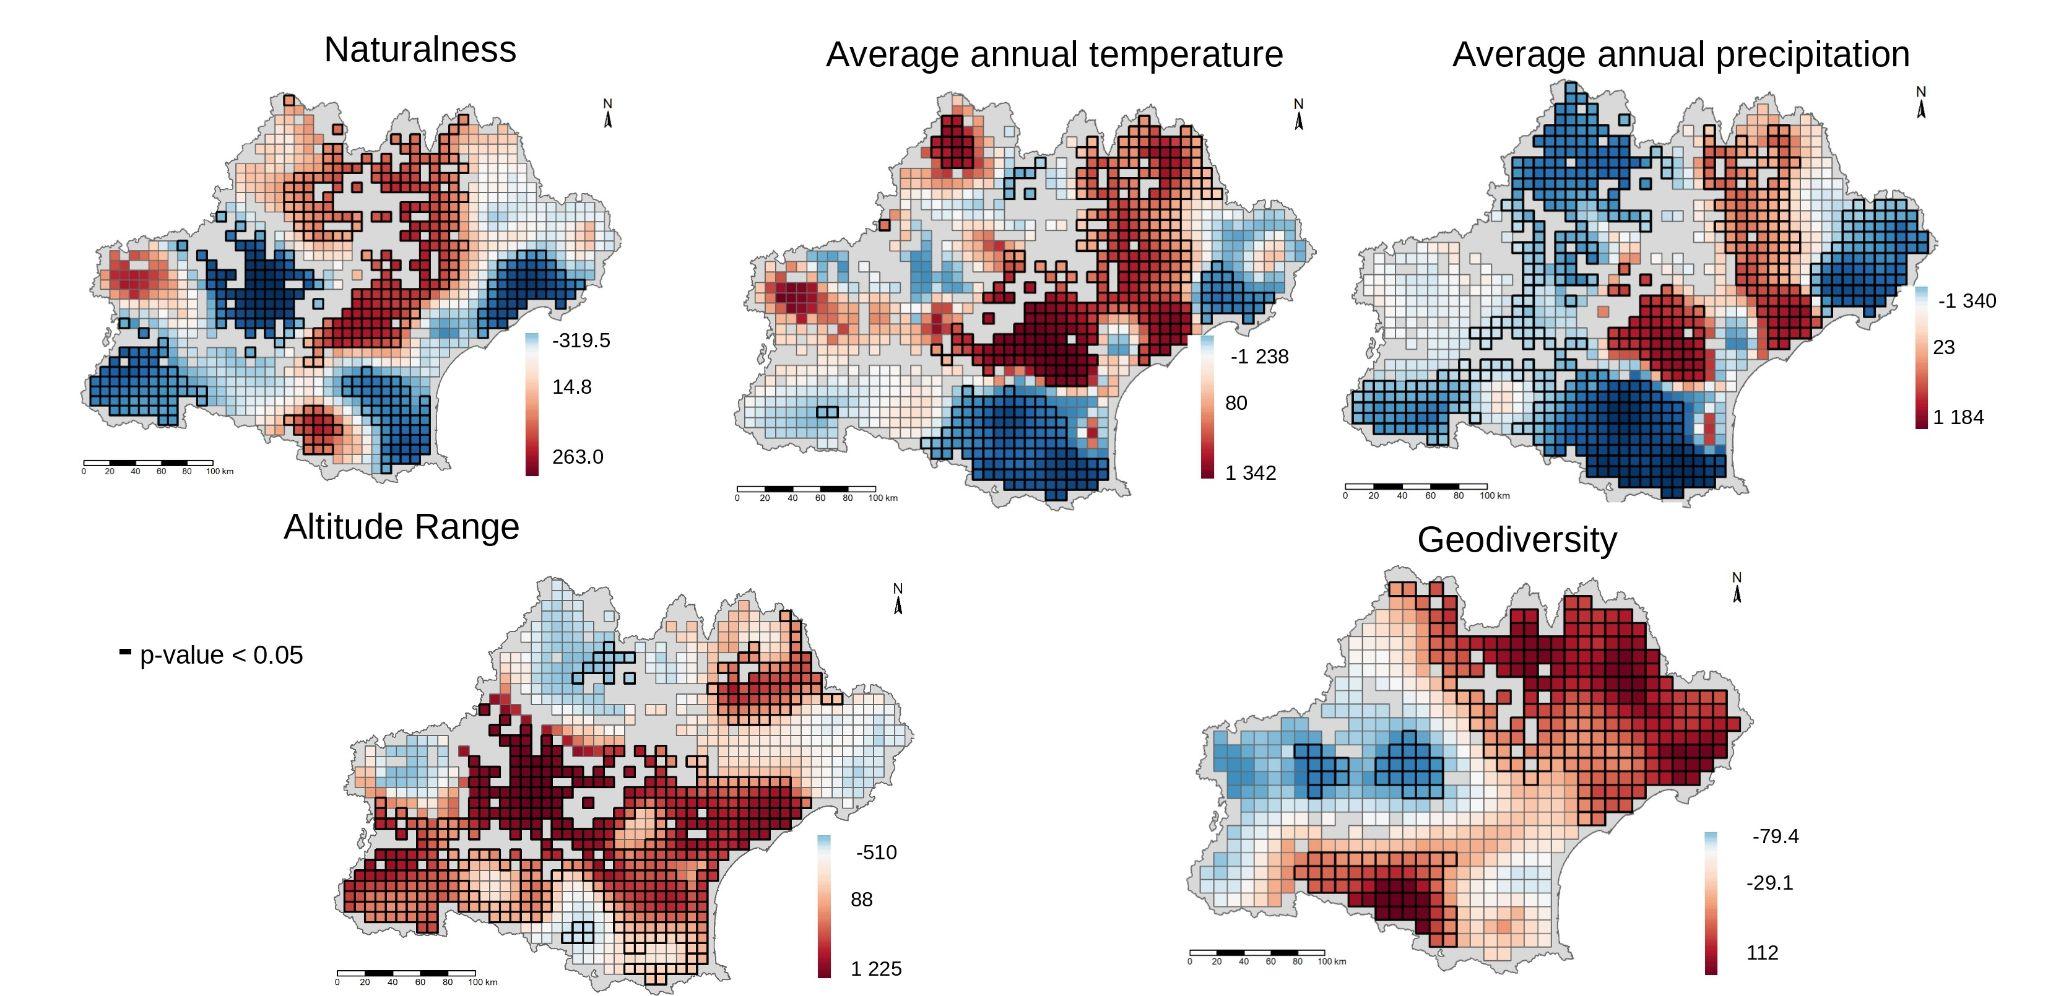
**

**Grid of 10 km**


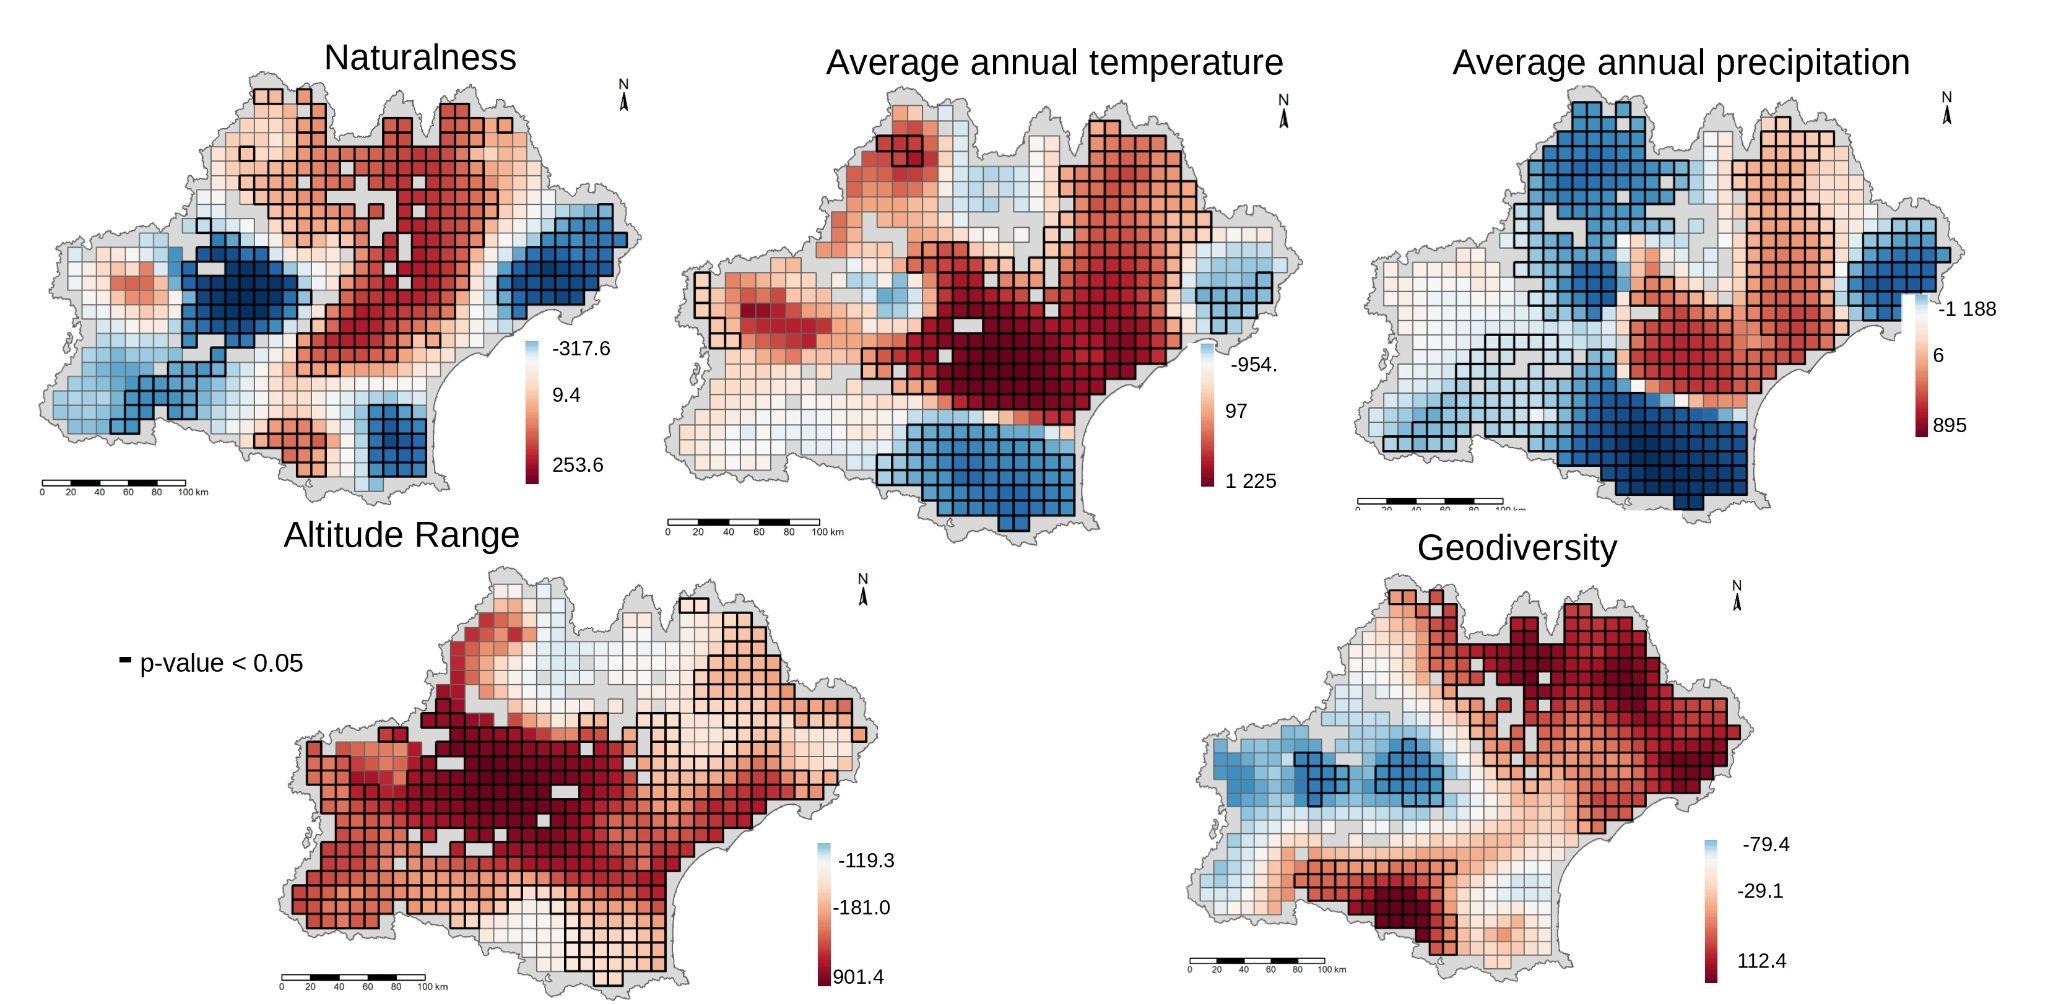


**B- Butterflies**

**Grid of 5 km**

**
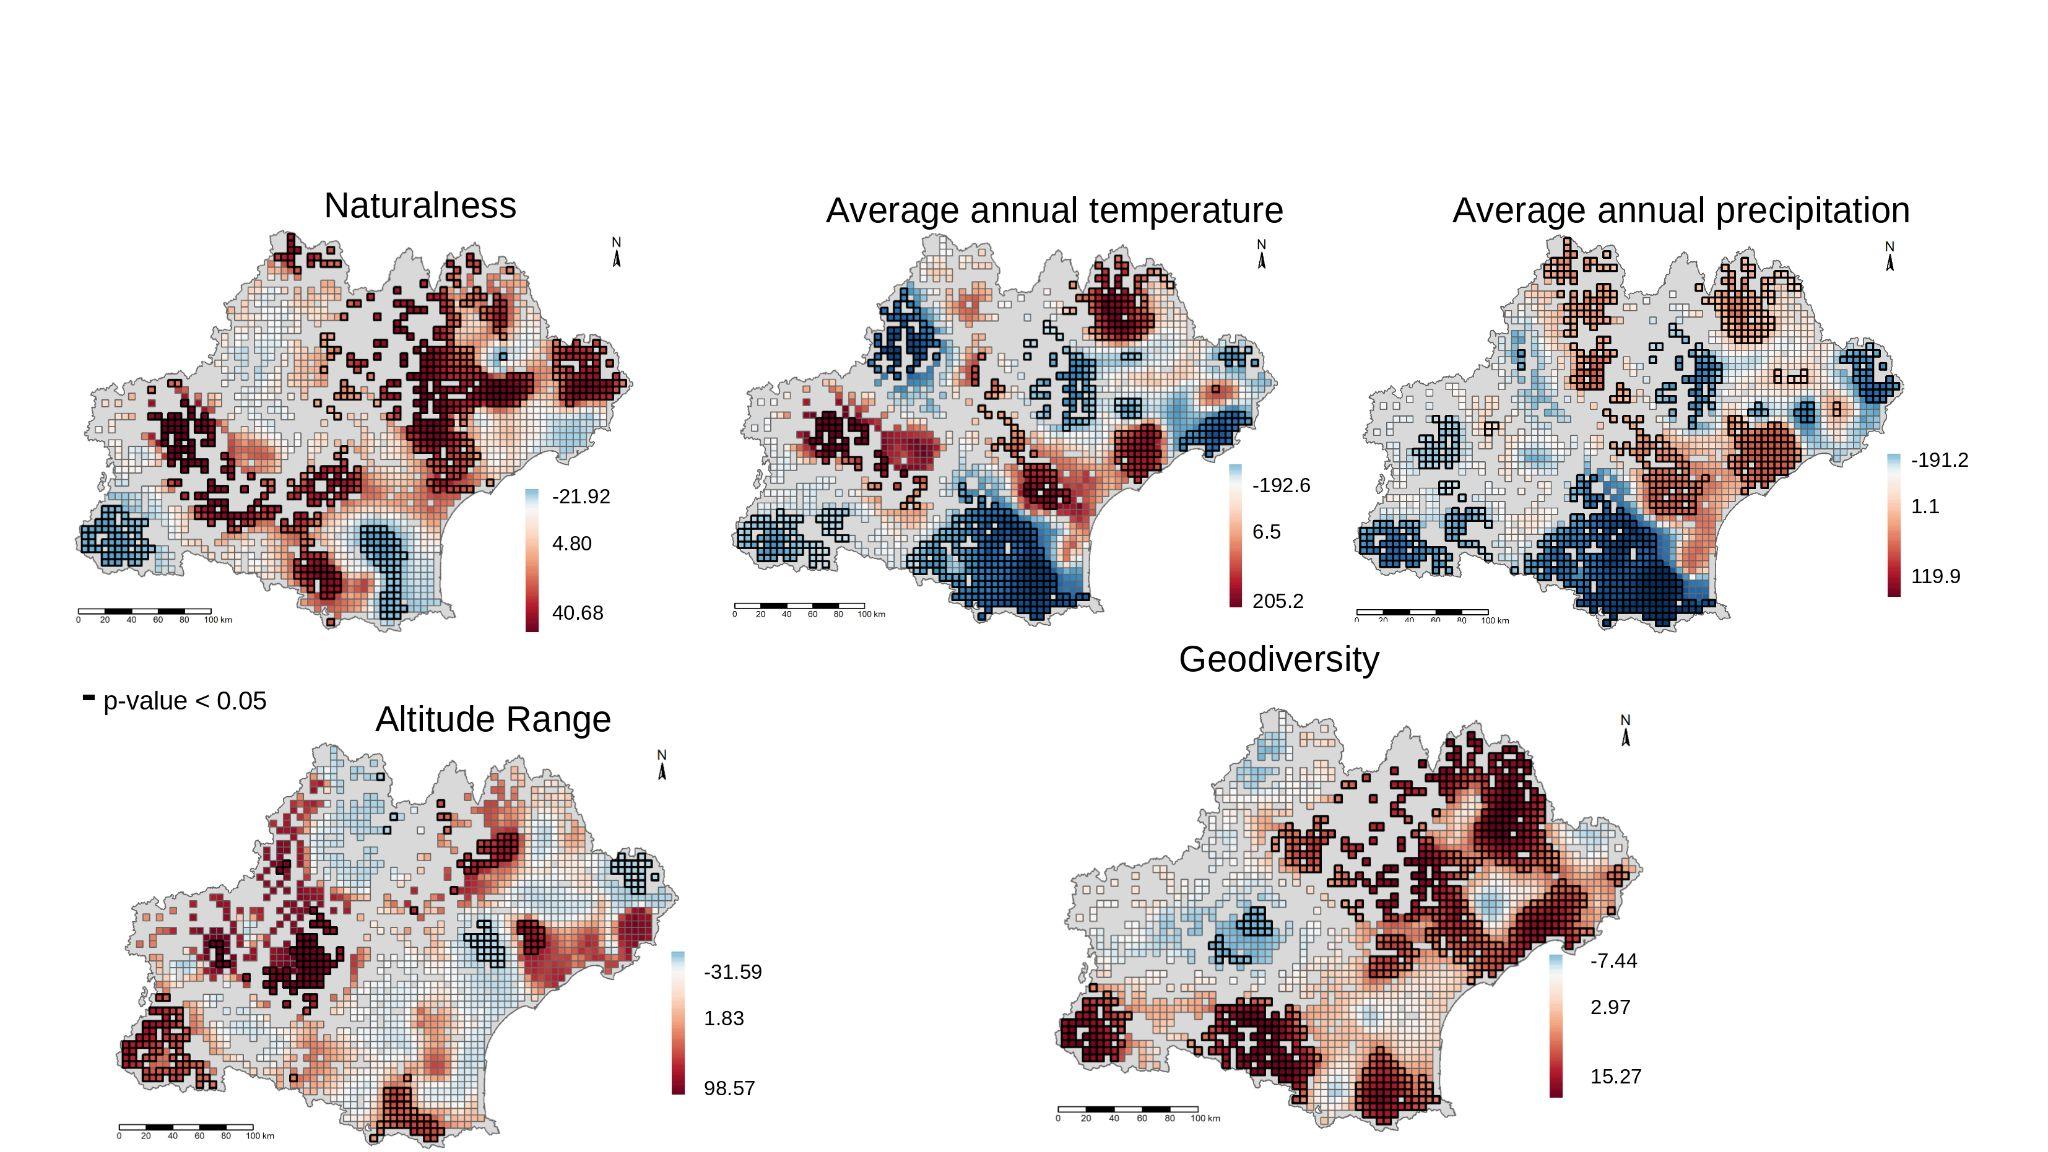
**

**Grid of 7.5 km**


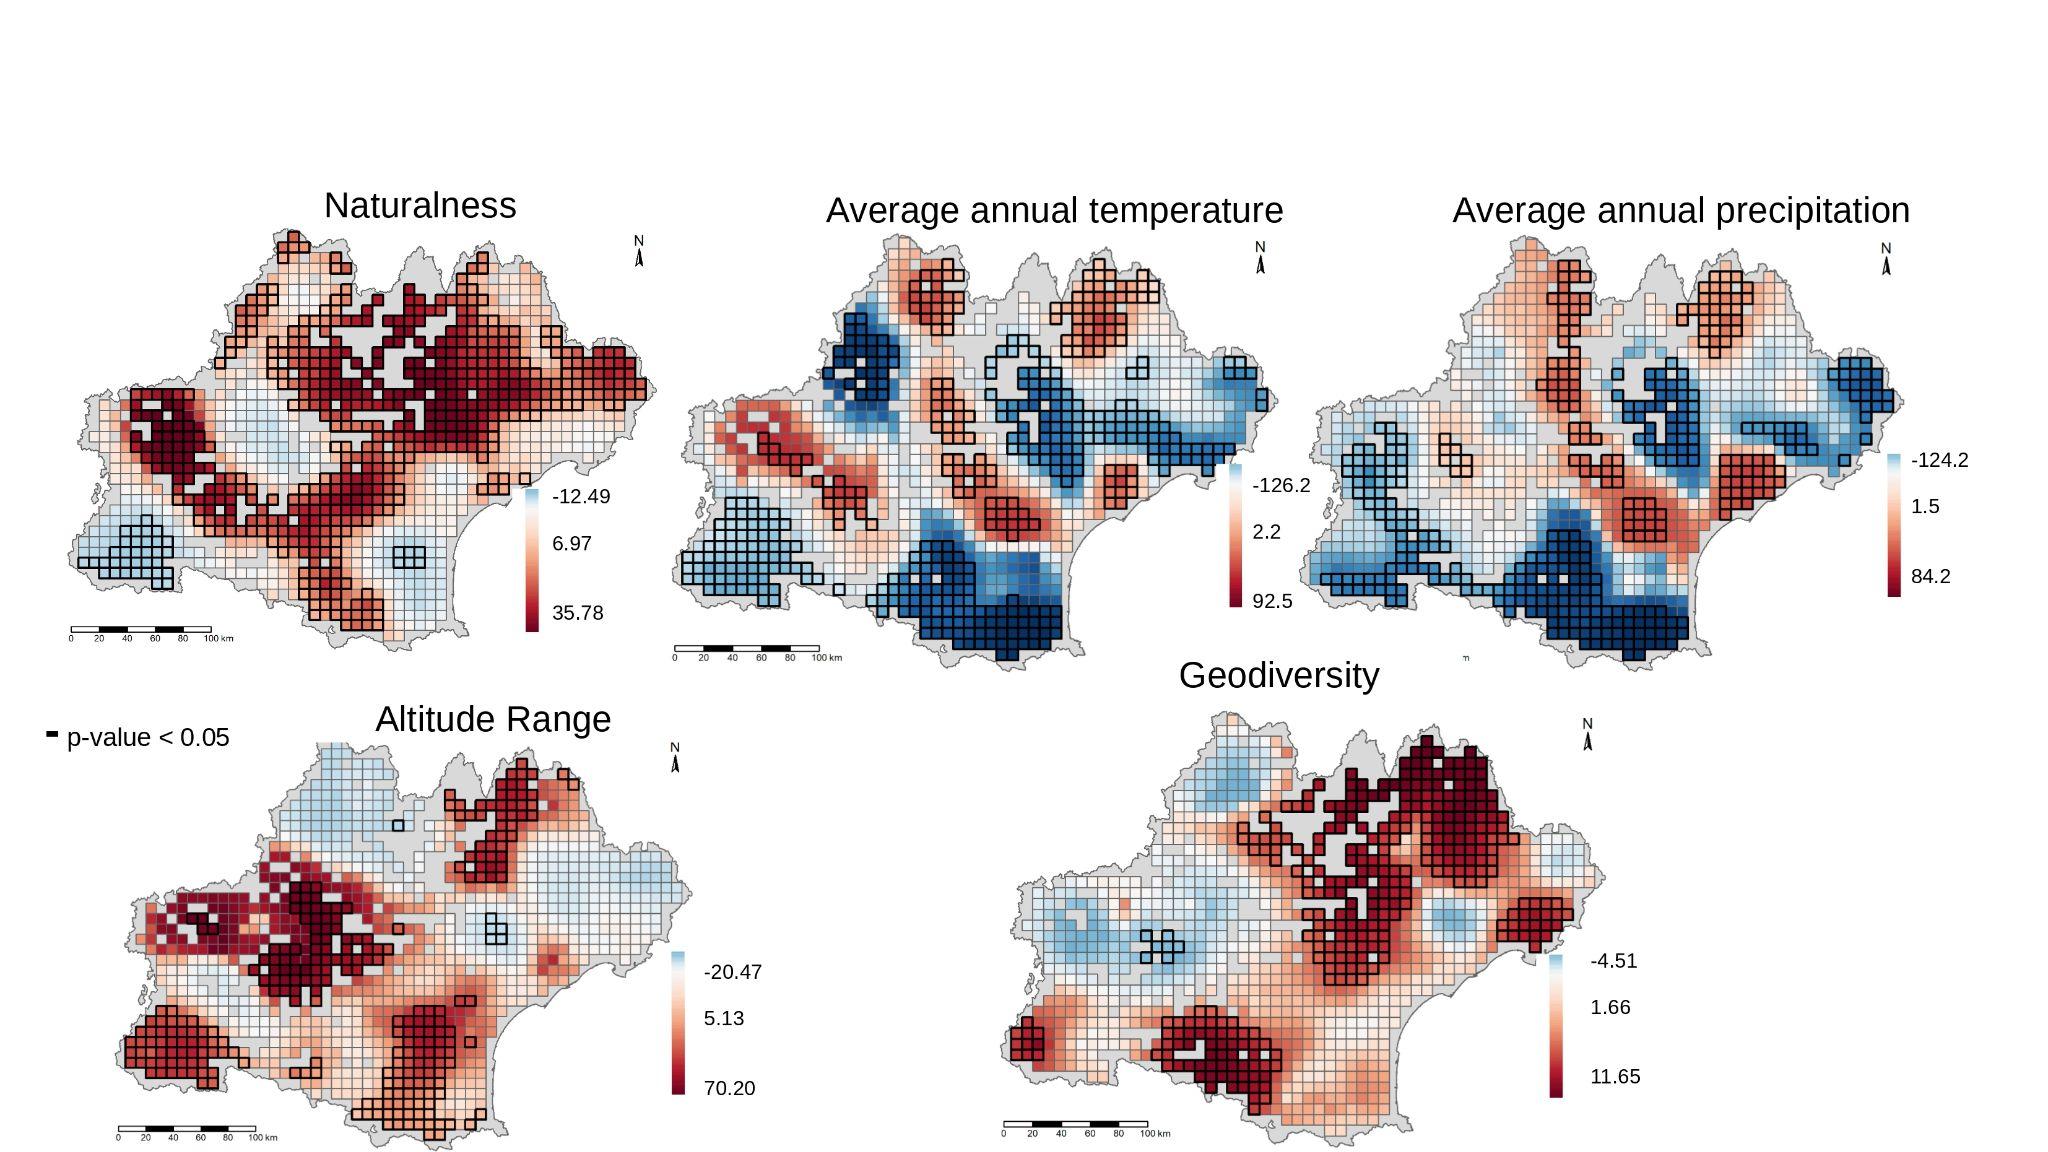


**Grid of 10 km**

**
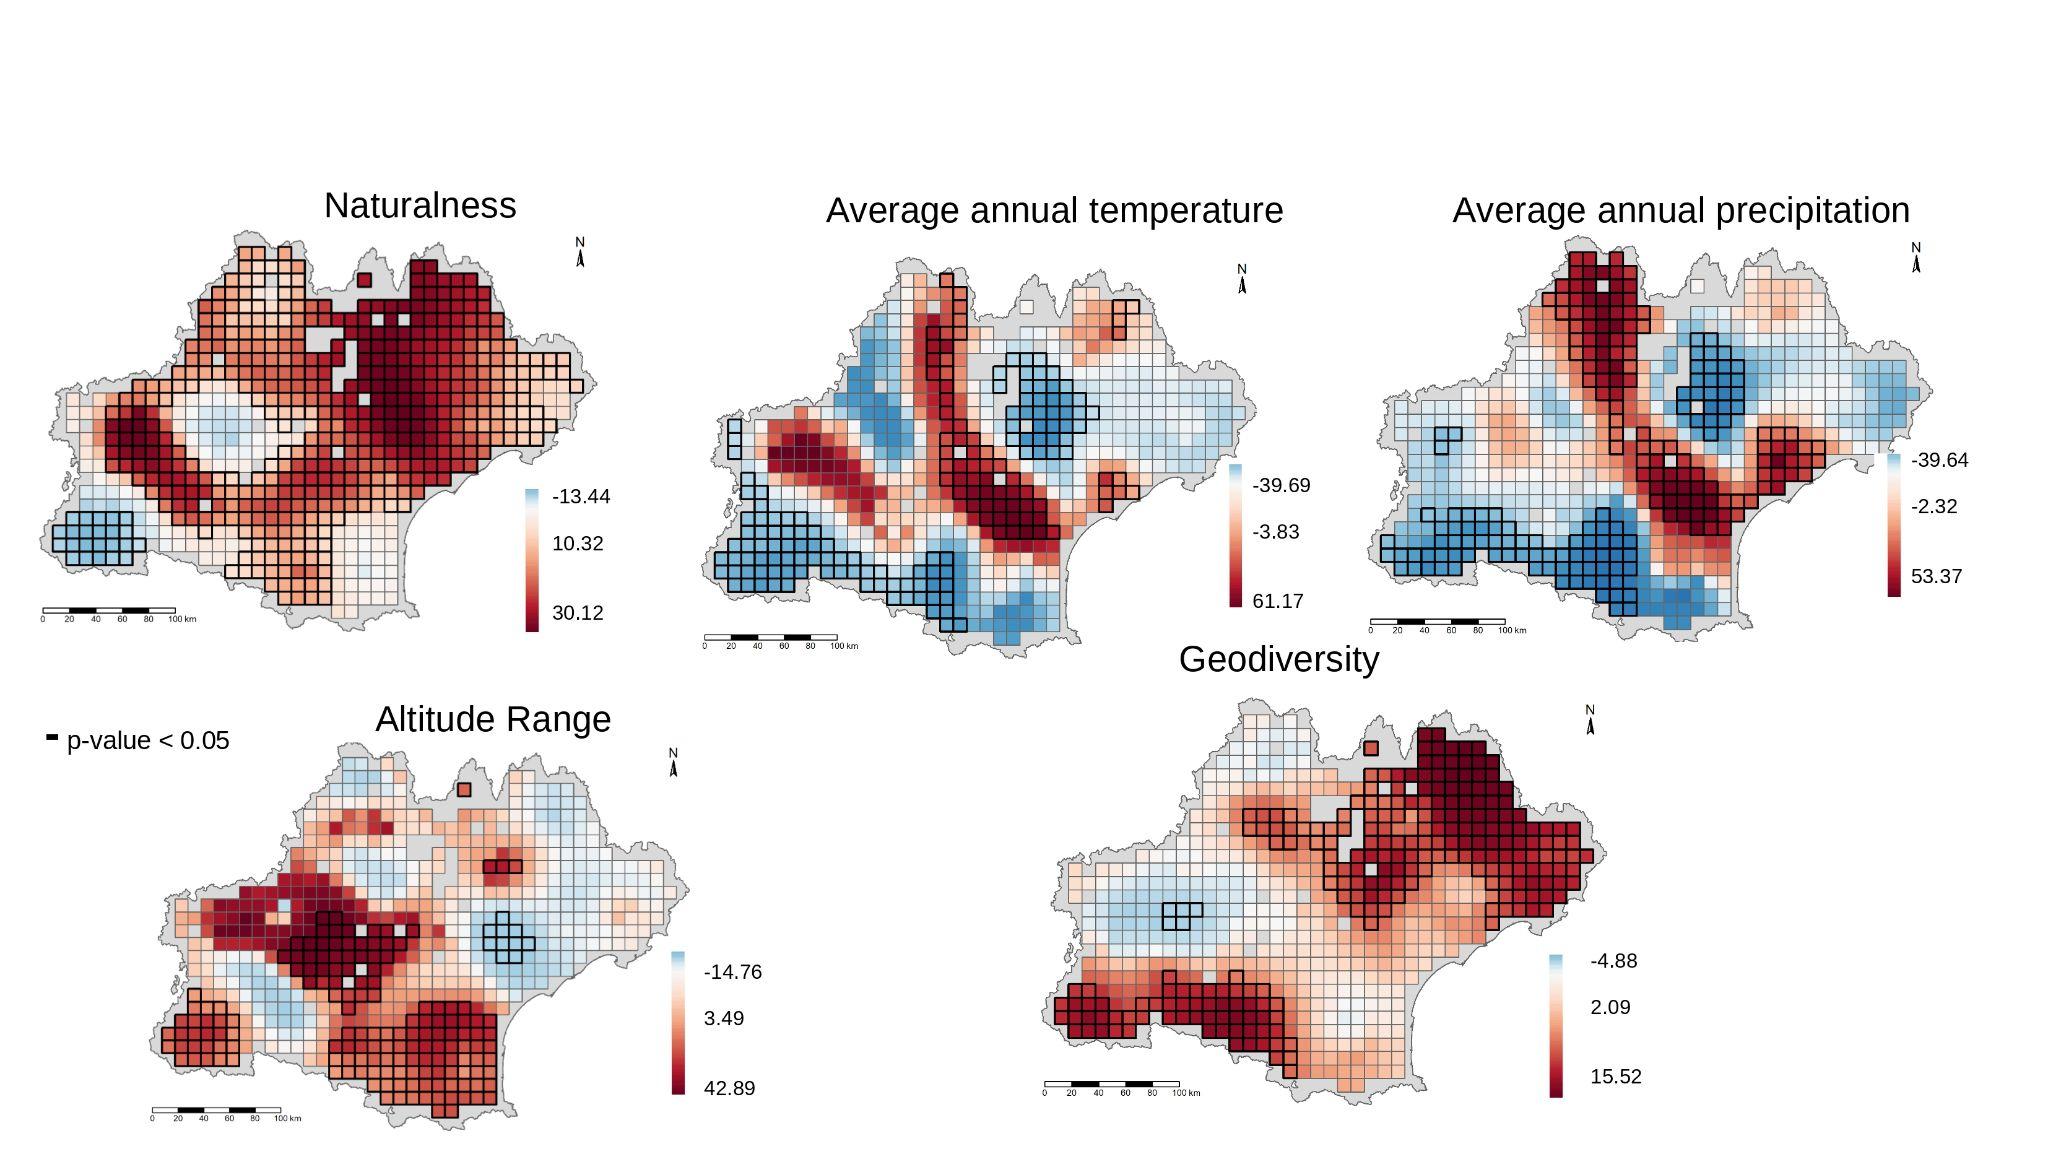
**

**C-Birds**

**Grid of 5 km**

**
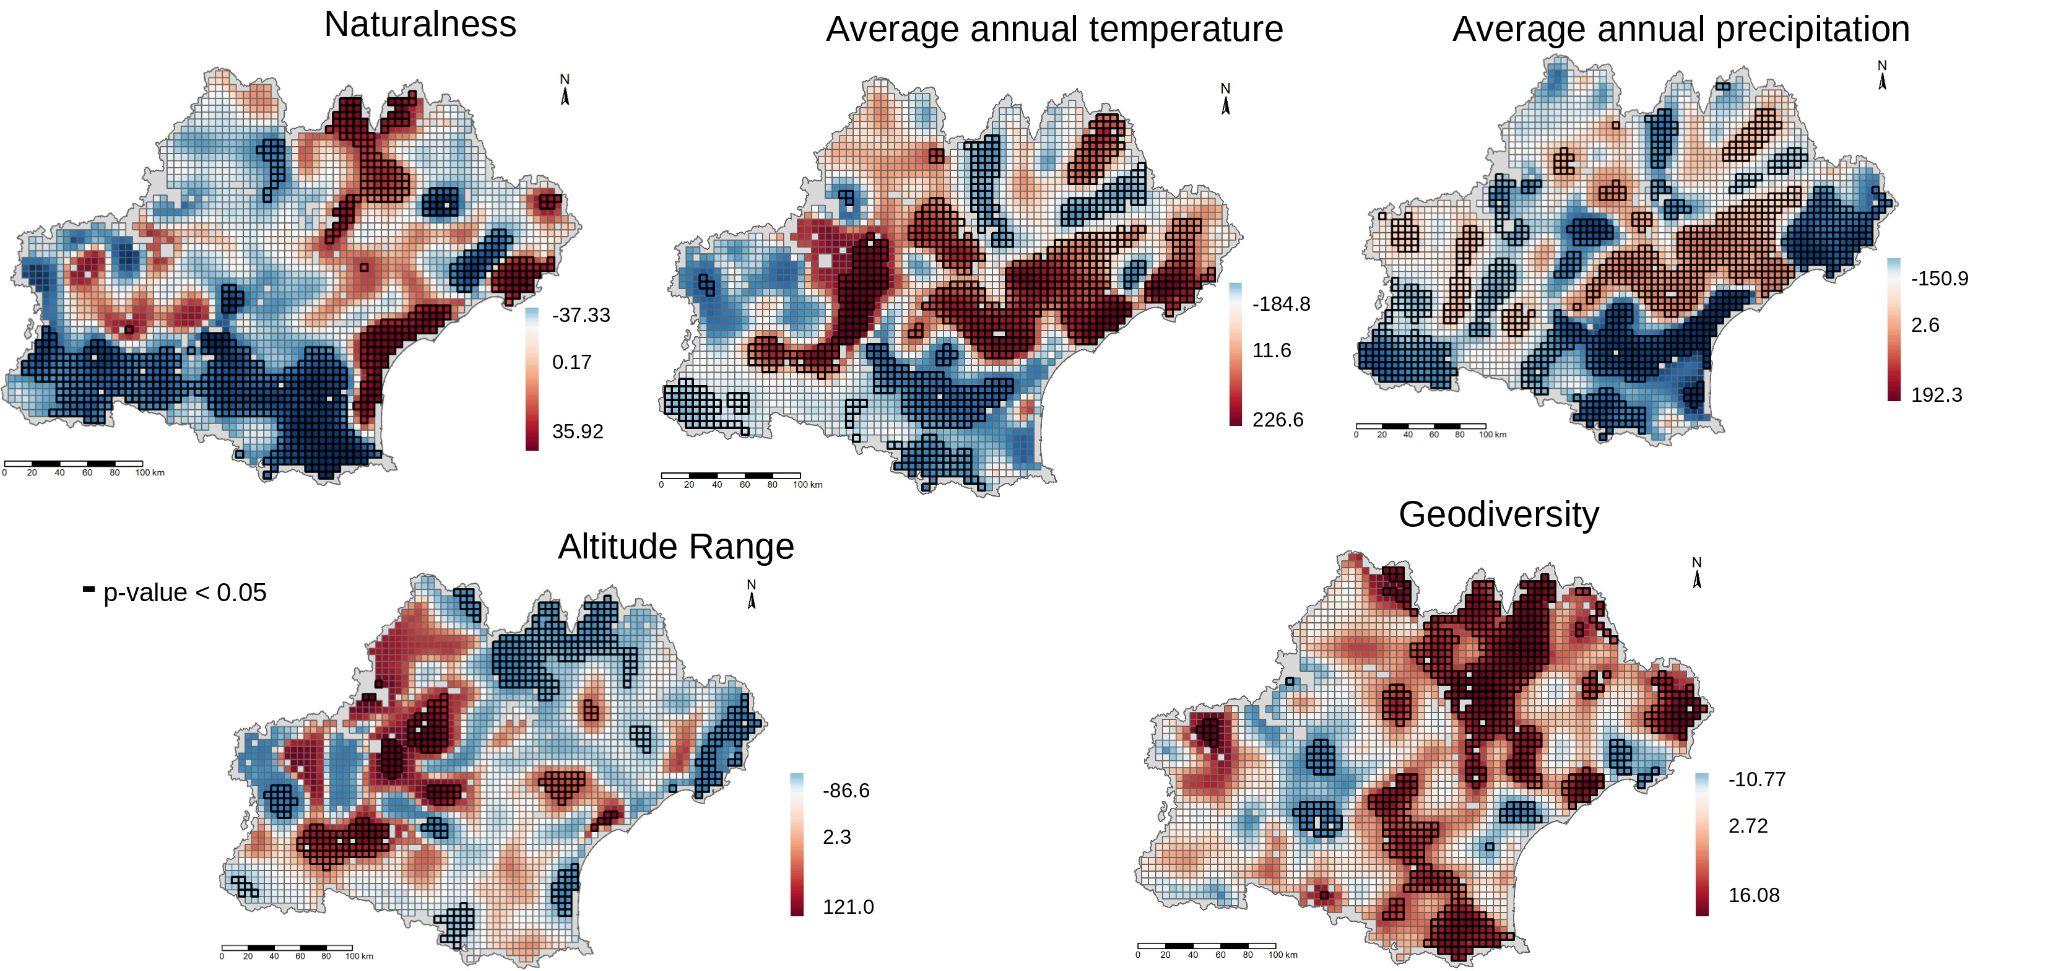
**

**Grid of 7.5 km**

**
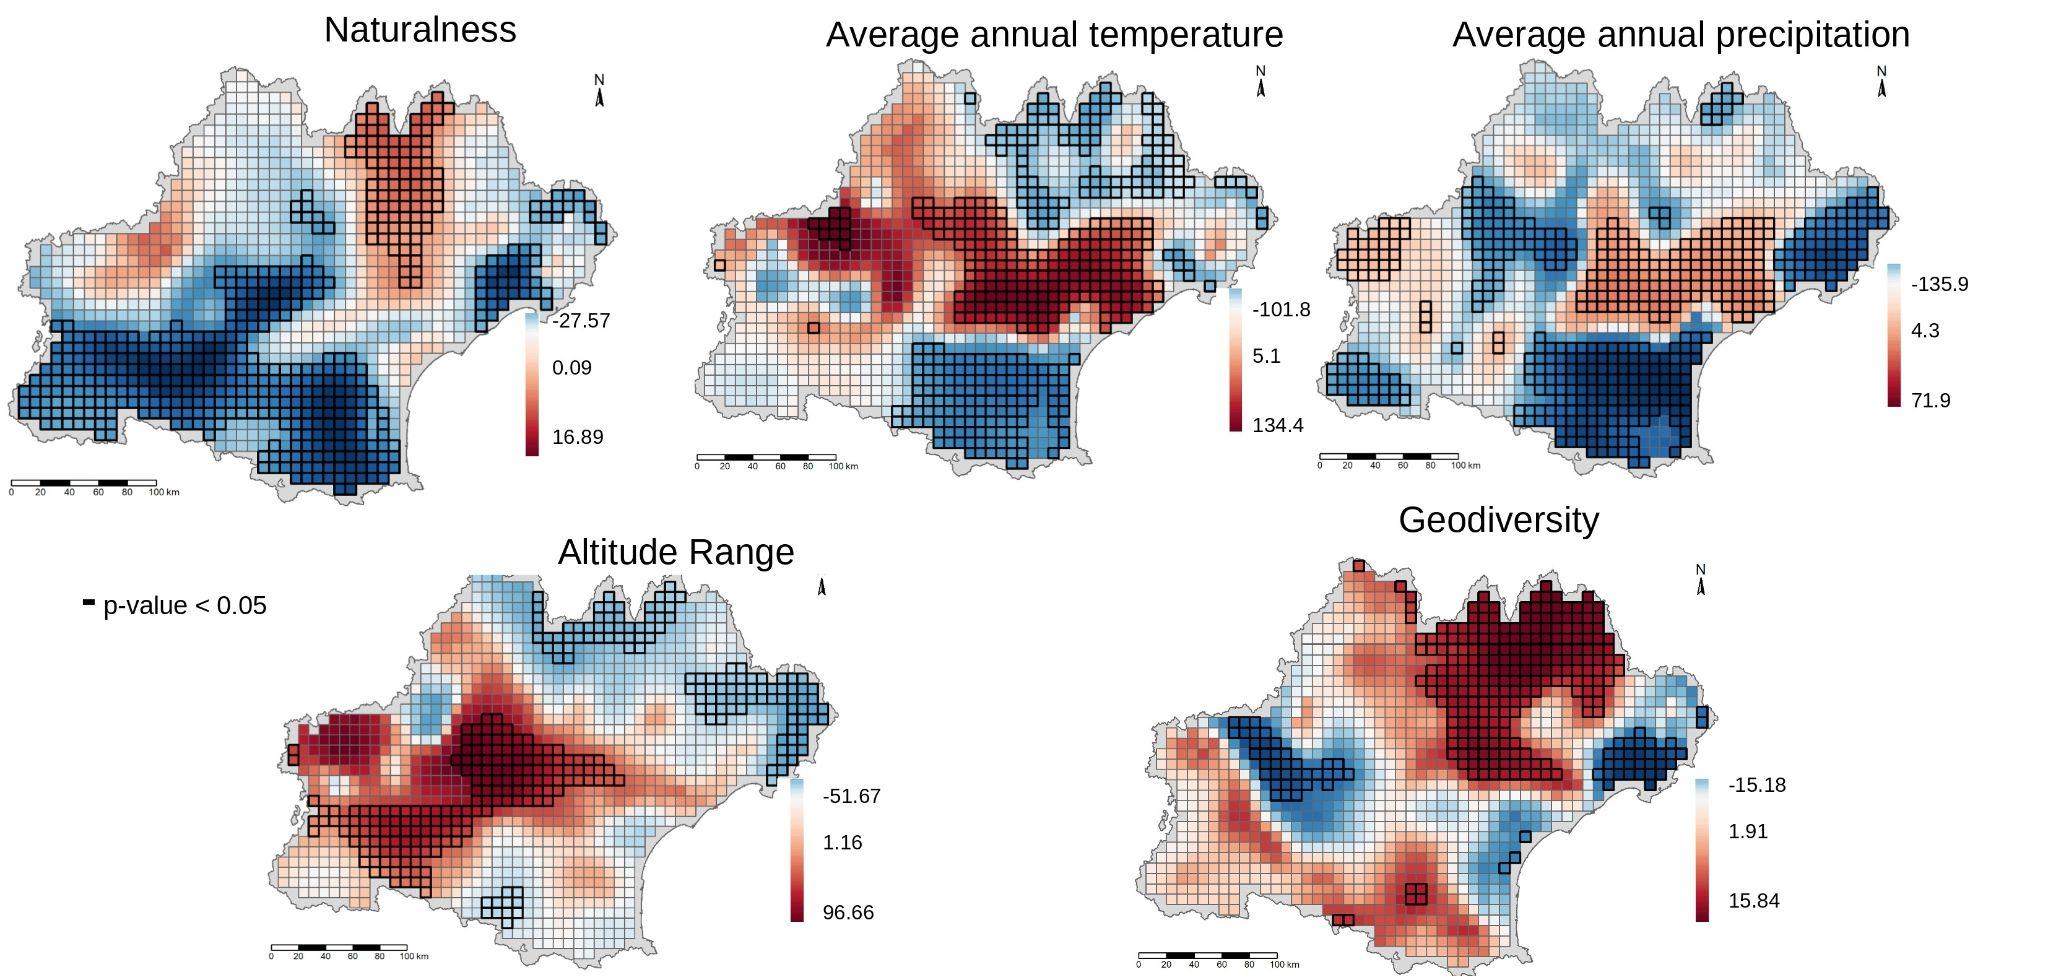
**

**Grid of 10 km**


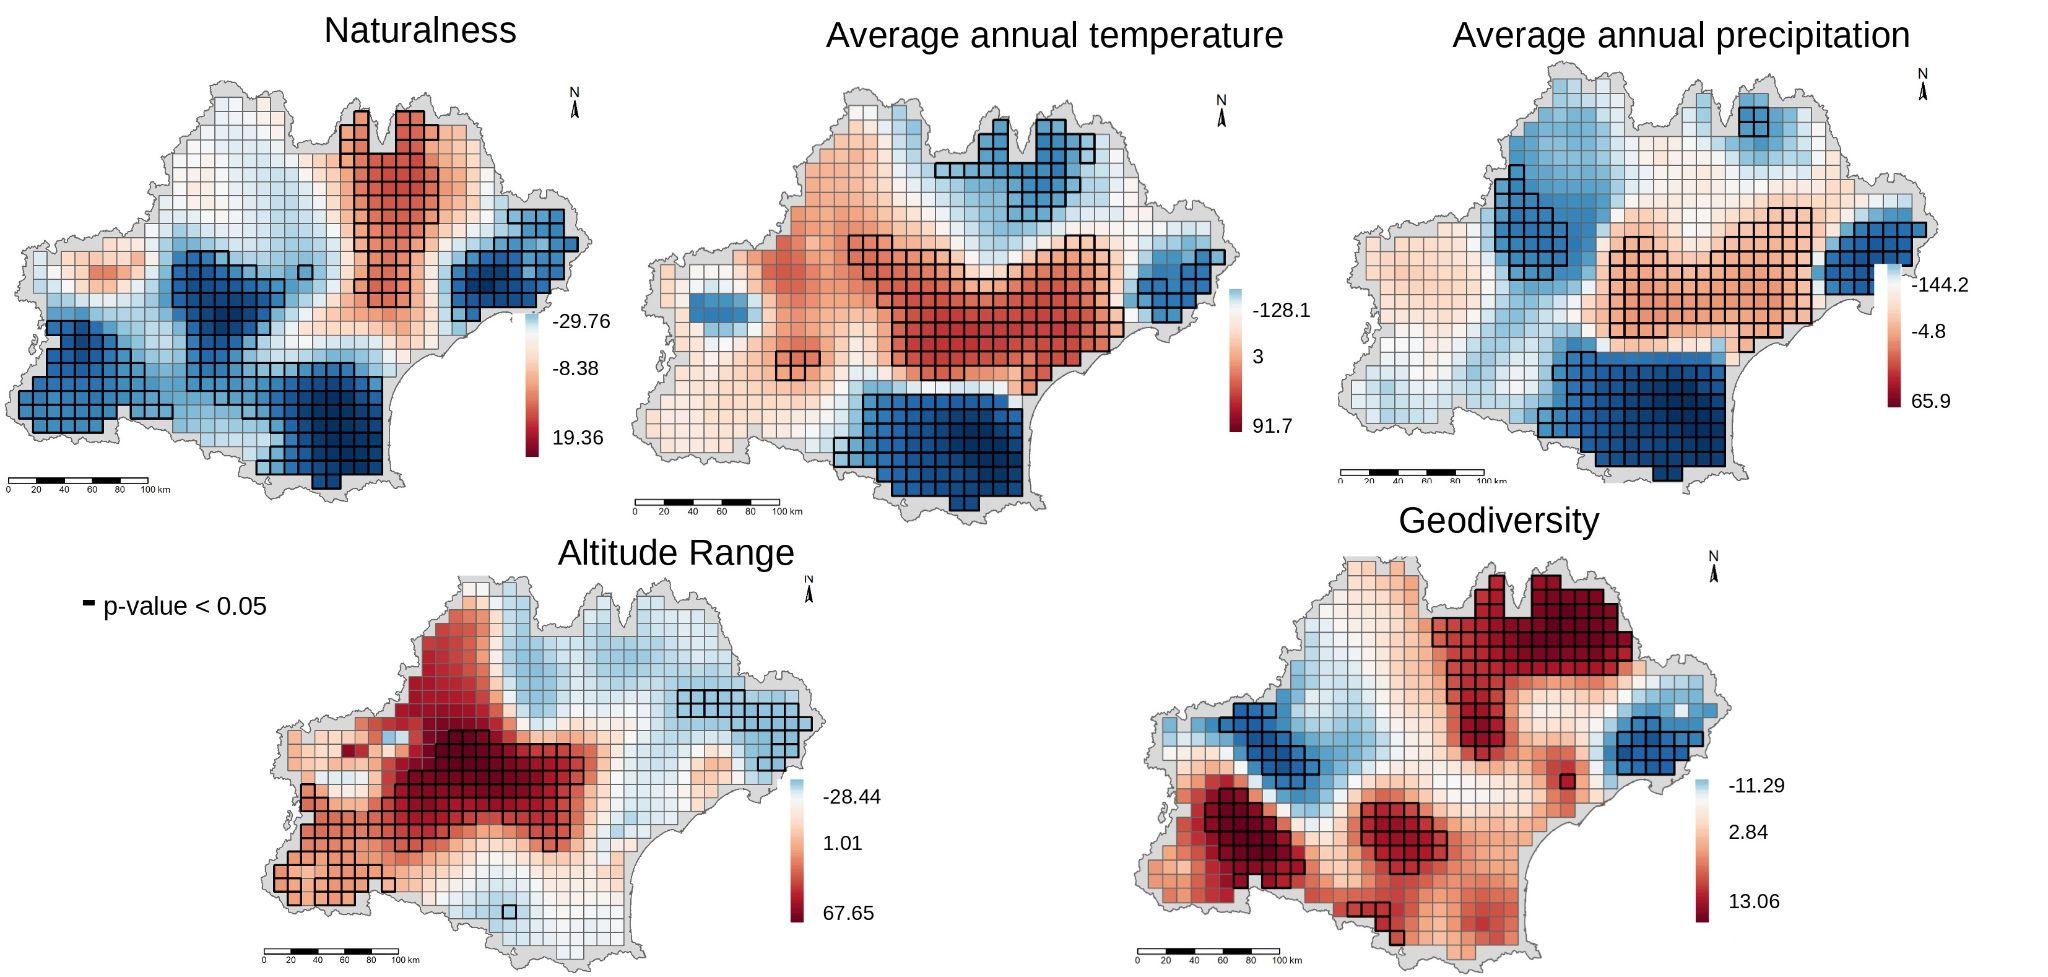


**Fig. S6:** Intersect of significant positive GWR correlations common between taxa. Number of grid cells showing a significant correlation for the three taxa is represented for each predictive environmental variable and spatial scale (5, 7.5 and 10km)


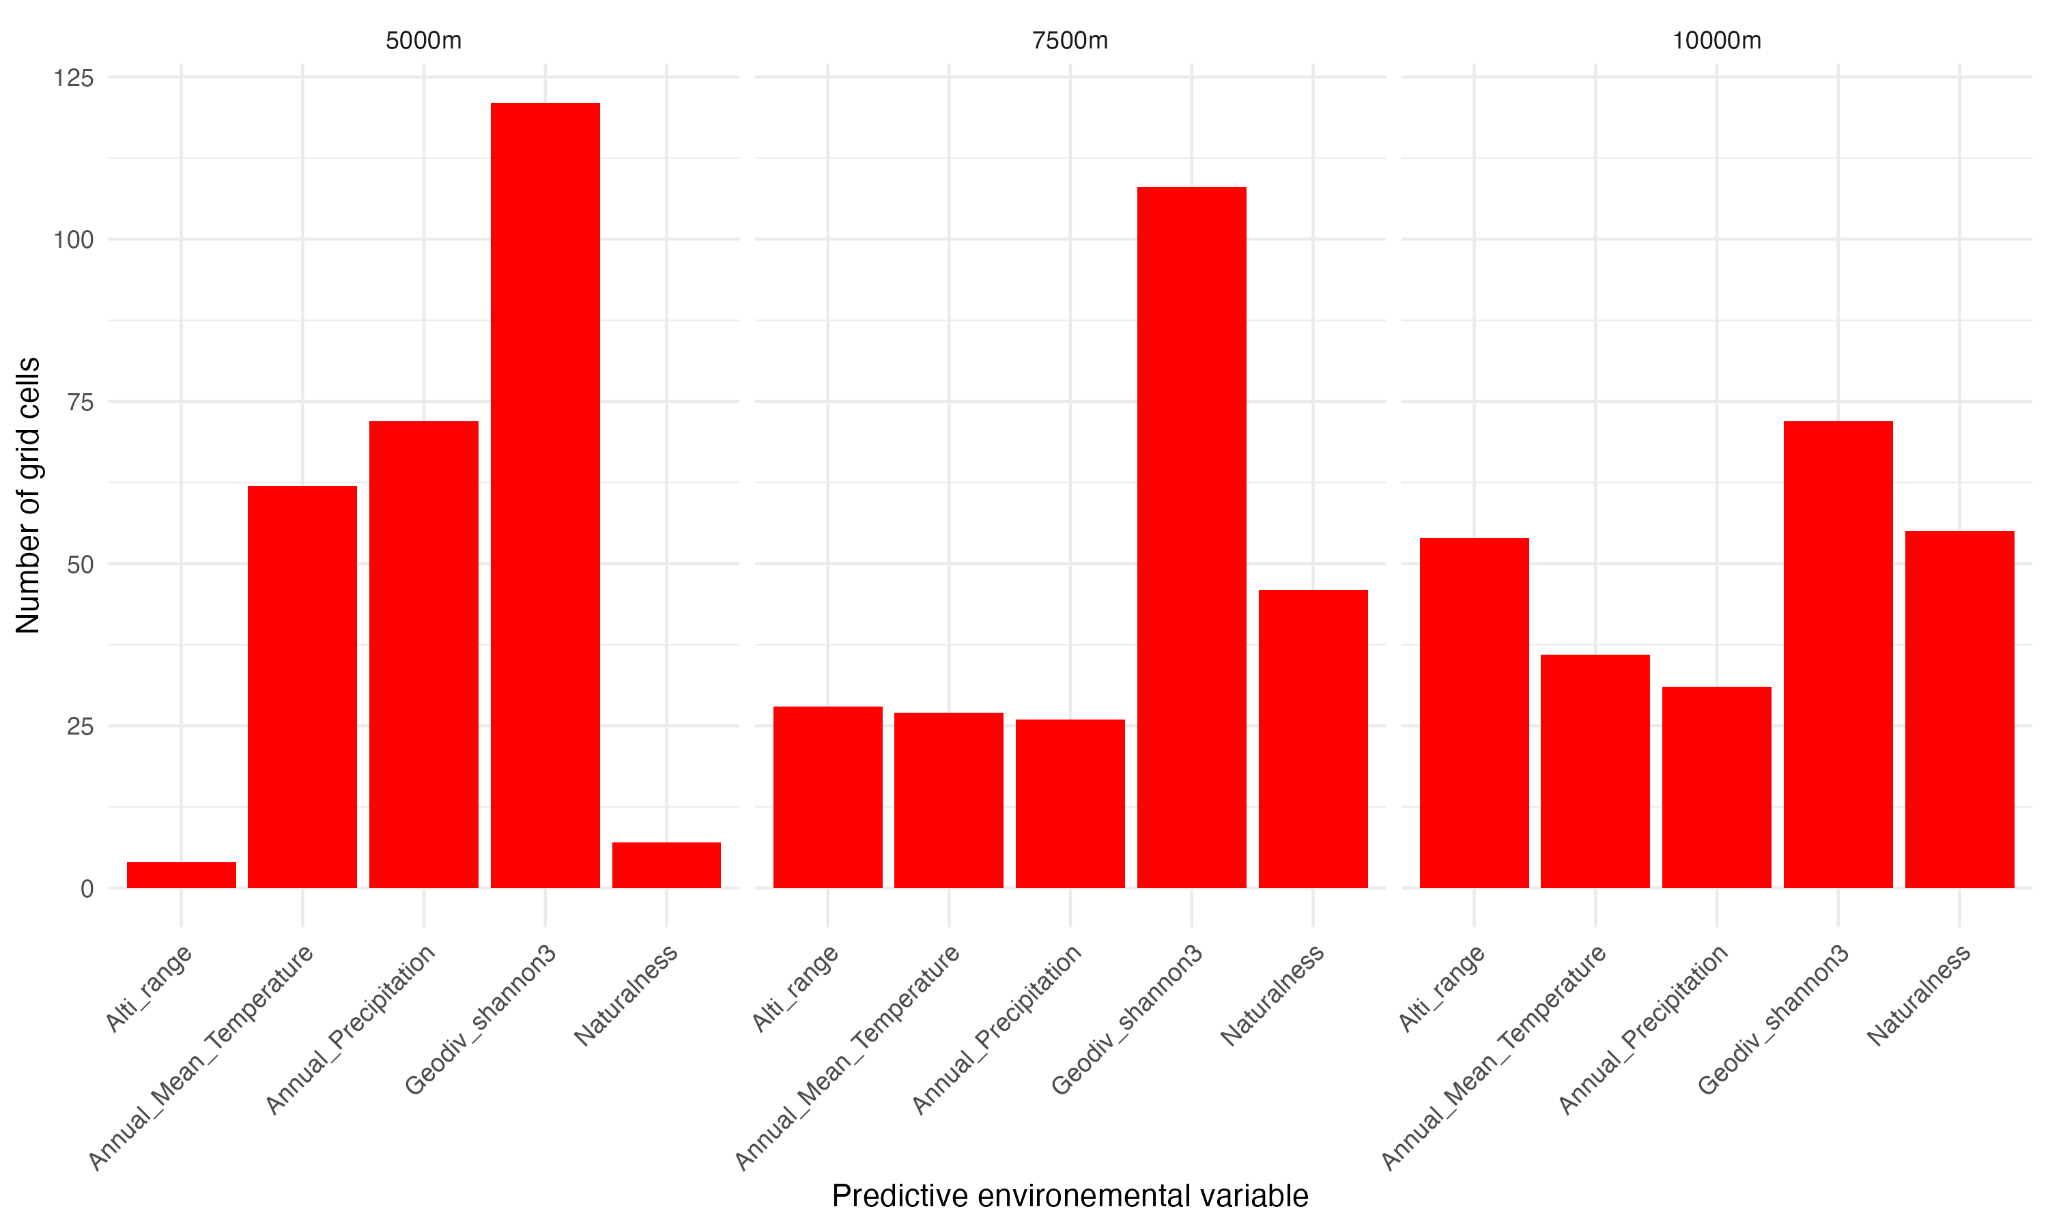


Fig S.7: Standardized coefficients (± 95% CI) from the best-fitting spatial models (SAR and SEM), showing the effects of overall geodiversity (without geomorphological diversity) and environmental covariates on regional species richness. Tracheophyta: vascular plants; Rhopalocera: butterflies; Aves: birds; Nat: naturalness; Temp: annual mean temperature; Prec: annual mean precipitation; ΔElev: altitude range; Shgeo: Shannon geodiversity.

**
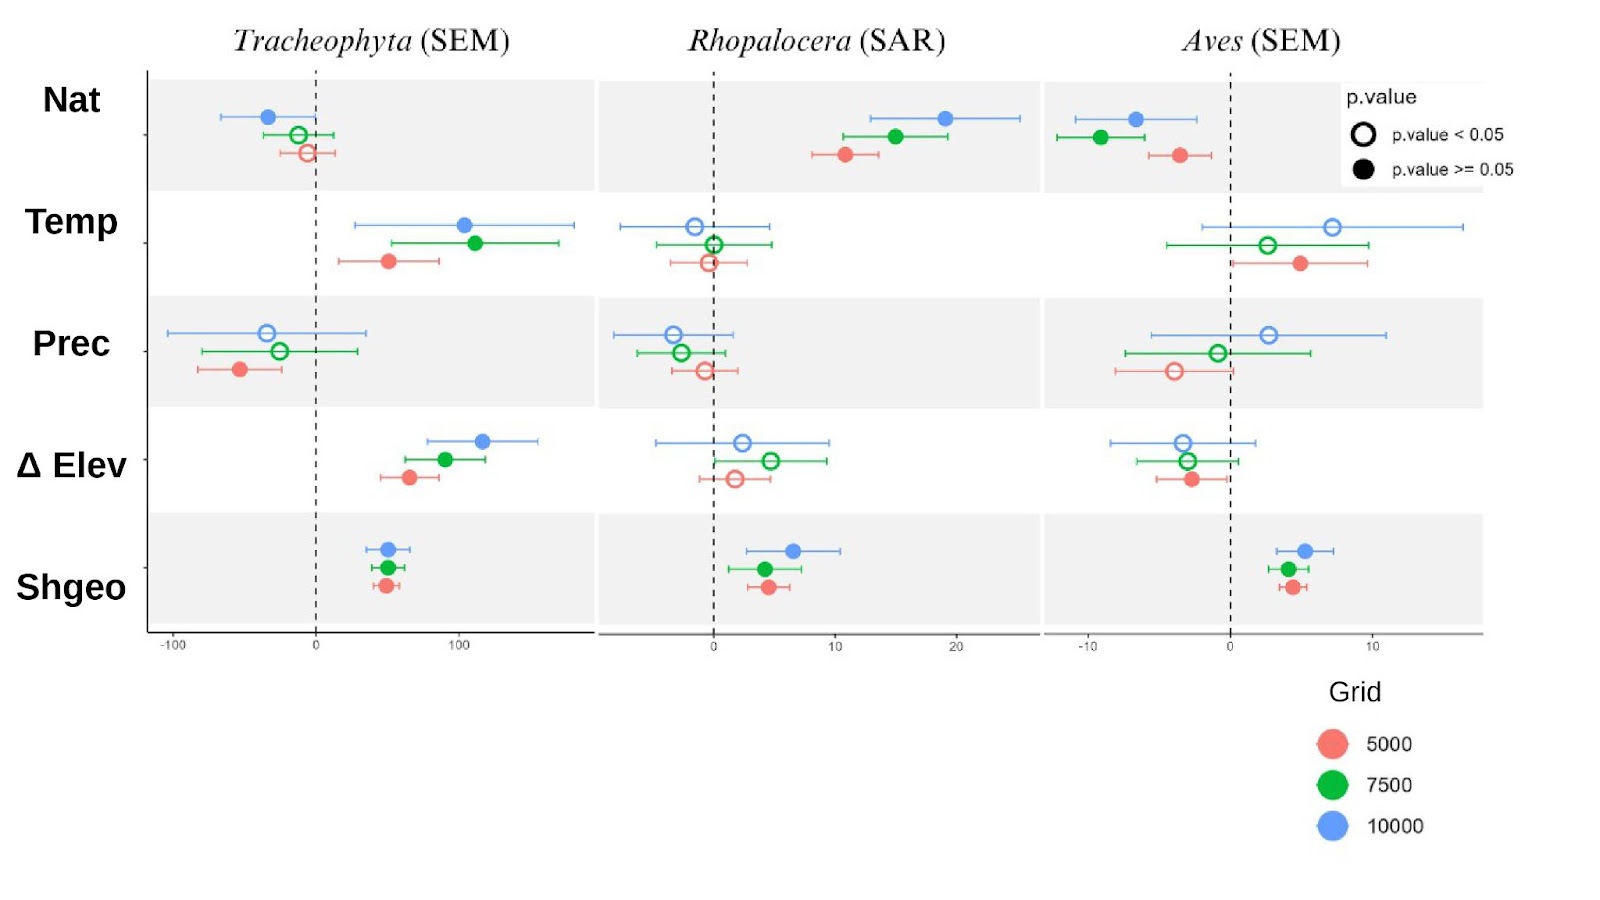
**
